# Supplementary material for: Pubertal stage, sex and behaviour in neurodevelopmental disorders versus typical development: a cross-sectional study
Source: PubMed Central journal article supplement — BMJ Paediatr Open. 2022 Aug 23;6(1):e001469. doi: 10.1136/bmjpo-2022-001469 (PMC9403165; doi:10.1136/bmjpo-2022-001469), 2022-08-23
Supplement: bmjpo-2022-001469.draft_revisions.pdf [file bmjpo-2022-001469.draft_revisions.pdf]

# BMJ Paediatrics Open

BMJ Paediatrics Open is committed to open peer review. As part of this commitment we make the peer review history of every article we publish publicly available.

When an article is published we post the peer reviewers' comments and the authors' responses online. We also post the versions of the paper that were used during peer review. These are the versions that the peer review comments apply to.

The versions of the paper that follow are the versions that were submitted during the peer review process. They are not the versions of record or the final published versions. They should not be cited or distributed as the published version of this manuscript.

BMJ Paediatrics Open is an open access journal and the full, final, typeset and author-corrected version of record of the manuscript is available on our site with no access controls, subscription charges or pay-per-view fees (<http://bmjpaedsopen.bmj.com>).

If you have any questions on BMJ Paediatrics Open's open peer review process please email [info.bmjpo@bmj.com](mailto:info.bmjpo@bmj.com)

# BMJ Paediatrics Open

## Pubertal stage, sex, and behavior in neurodevelopmental disorders versus typical development: a cross-sectional study

|                               |                                                                                                                                                                                                                                                                                                                                                                                                                                                                                                                                                                                                                                                                                                                         |
|-------------------------------|-------------------------------------------------------------------------------------------------------------------------------------------------------------------------------------------------------------------------------------------------------------------------------------------------------------------------------------------------------------------------------------------------------------------------------------------------------------------------------------------------------------------------------------------------------------------------------------------------------------------------------------------------------------------------------------------------------------------------|
| Journal:                      | <i>BMJ Paediatrics Open</i>                                                                                                                                                                                                                                                                                                                                                                                                                                                                                                                                                                                                                                                                                             |
| Manuscript ID                 | bmjpo-2022-001469.R1                                                                                                                                                                                                                                                                                                                                                                                                                                                                                                                                                                                                                                                                                                    |
| Article Type:                 | Original research                                                                                                                                                                                                                                                                                                                                                                                                                                                                                                                                                                                                                                                                                                       |
| Date Submitted by the Author: | 13-Apr-2022                                                                                                                                                                                                                                                                                                                                                                                                                                                                                                                                                                                                                                                                                                             |
| Complete List of Authors:     | Penner, Melanie; Holland Bloorview Kids Rehabilitation Hospital, ; University of Toronto Faculty of Medicine, Paediatrics<br>Dupuis, Annie; University of Toronto Dalla Lana School of Public Health<br>Arnold, Paul; Hotchkiss Brain Institute<br>Ayub, Muhammad; Queen's University, Psychiatry<br>Crosbie, Jennifer; The Hospital for Sick Children, Psychiatry<br>Georgiades, Stelios; McMaster University, Department of Psychiatry and Behavioural Neurosciences<br>Kelley, Elizabeth; Queen's University, Psychology<br>Nicolson, Robert; Western University, Psychiatry<br>Schachar, Russell; The Hospital for Sick Children, Psychiatry<br>Anagnostou, Evdokia; Holland Bloorview Kids Rehabilitation Hospital |
| Keywords:                     | Adolescent Health, Child Psychiatry                                                                                                                                                                                                                                                                                                                                                                                                                                                                                                                                                                                                                                                                                     |
|                               |                                                                                                                                                                                                                                                                                                                                                                                                                                                                                                                                                                                                                                                                                                                         |

SCHOLARONE™  
Manuscripts

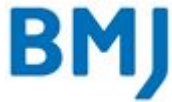

I, the Submitting Author has the right to grant and does grant on behalf of all authors of the Work (as defined in the below author licence), an exclusive licence and/or a non-exclusive licence for contributions from authors who are: i) UK Crown employees; ii) where BMJ has agreed a CC-BY licence shall apply, and/or iii) in accordance with the terms applicable for US Federal Government officers or employees acting as part of their official duties; on a worldwide, perpetual, irrevocable, royalty-free basis to BMJ Publishing Group Ltd ("BMJ") its licensees and where the relevant Journal is co-owned by BMJ to the co-owners of the Journal, to publish the Work in this journal and any other BMJ products and to exploit all rights, as set out in our [licence](#).

The Submitting Author accepts and understands that any supply made under these terms is made by BMJ to the Submitting Author unless you are acting as an employee on behalf of your employer or a postgraduate student of an affiliated institution which is paying any applicable article publishing charge ("APC") for Open Access articles. Where the Submitting Author wishes to make the Work available on an Open Access basis (and intends to pay the relevant APC), the terms of reuse of such Open Access shall be governed by a Creative Commons licence – details of these licences and which [Creative Commons](#) licence will apply to this Work are set out in our licence referred to above.

Other than as permitted in any relevant BMJ Author's Self Archiving Policies, I confirm this Work has not been accepted for publication elsewhere, is not being considered for publication elsewhere and does not duplicate material already published. I confirm all authors consent to publication of this Work and authorise the granting of this licence.

1  
2  
3 **Pubertal stage, sex, and behavior in neurodevelopmental disorders versus typical**  
4  
5 **development: a cross-sectional study**  
6  
7

8 **Authors:**  
9

- 10  
11  
12 1. Melanie Penner MD MSc FRCP(C): Bloorview Research Institute, Holland Bloorview  
13 Kids Rehabilitation Hospital, 150 Kilgour Rd., Toronto, Ontario, Canada; Department of  
14 Paediatrics, University of Toronto, 555 University Ave., Toronto, Ontario, Canada;  
15  
16 mpenner@hollandbloorview.ca  
17  
18  
19  
20  
21 2. Annie Dupuis PhD: Dalla Lana School of Public Health, University of Toronto, 155  
22 College St., Toronto, Ontario, Canada; [annie.dupuis@mdstats.ca](mailto:annie.dupuis@mdstats.ca)  
23  
24  
25  
26 3. Paul Arnold MD PhD FRCP(C): The Mathison Centre for Mental Health Research &  
27 Education, Hotchkiss Brain Institute, Cumming School of Medicine, University of  
28 Calgary. 4D60, Teaching, Research and Wellness (TRW) Building, 3280 Hospital Dr  
29 NW, Calgary AB, Canada. T2N 4Z6. [Paul.arnold@ucalgary.ca](mailto:Paul.arnold@ucalgary.ca)  
30  
31  
32  
33  
34  
35 4. Muhammad Ayub MBBS MRCPsych MSc MD: Department of Psychiatry, Queen's  
36 University, 191 Portsmouth Ave, Kingston, Ontario, Canada; Department of Psychiatry,  
37 University College London, London, UK; [ma84@queensu.ca](mailto:ma84@queensu.ca)  
38  
39  
40  
41 5. Jennifer Crosbie PhD: Department of Psychiatry, Hospital for Sick Children, 555  
42 University Ave., Toronto, Ontario, Canada; [jennifer.crosbie@sickkids.ca](mailto:jennifer.crosbie@sickkids.ca)  
43  
44  
45  
46 6. Stelios Georgiades PhD: Department of Psychiatry and Behavioural Neurosciences,  
47 McMaster University, 175 Longwood Ave. S., Hamilton, Ontario, Canada;  
48  
49 georgis@mcmaster.ca  
50  
51  
52  
53 7. Elizabeth Kelley PhD: Department of Psychology, Queen's University, 62 Arch St.  
54  
55  
56  
57  
58  
59  
60

- 1  
2  
3 8. Robert Nicolson MD FRCP(C): Department of Psychiatry, Western University,  
4 Parkwood Institute, Mental Health Care Building, London, Ontario, Canada;  
5  
6 [micolso@uwo.ca](mailto:micolso@uwo.ca)  
7  
8  
9  
10 9. Russell Schachar MD FRCP(C): Department of Psychiatry, Hospital for Sick Children,  
11 555 University Ave., Toronto, Ontario, Canada; [russell.schachar@sickkids.ca](mailto:russell.schachar@sickkids.ca)  
12  
13  
14 10. Evdokia Anagnostou MD: Bloorview Research Institute, Holland Bloorview Kids  
15 Rehabilitation Hospital, 150 Kilgour Rd., Toronto, Ontario, Canada; Department of  
16 Paediatrics, University of Toronto, 555 University Ave., Toronto, Ontario, Canada;  
17  
18 [eanagnostou@hollandbloorview.ca](mailto:eanagnostou@hollandbloorview.ca)  
19  
20  
21  
22  
23  
24  
25  
26

27 **Address correspondence to:** Melanie Penner, Child Development Program, Holland Bloorview  
28 Kids Rehabilitation Hospital, 150 Kilgour Rd., Toronto, Ontario, M4G 1R8,  
29 [mpenner@hollandbloorview.ca](mailto:mpenner@hollandbloorview.ca), 416-425-6220  
30  
31  
32  
33

34 **Word count:** 2493  
35  
36  
37

38 **Funding:** This research was conducted with the support of the Ontario Brain Institute (POND,  
39 PIs: Anagnostou/Lerch; award number: Not Applicable), an independent non-profit corporation,  
40 funded partially by the Ontario government. The opinions, results and conclusions are those of  
41 the authors and no endorsement by the Ontario Brain Institute is intended or should be inferred.  
42  
43 The funding body has not directly influenced the research question, data analysis, or  
44  
45 interpretation of the findings of this study.  
46  
47  
48  
49  
50  
51  
52  
53  
54  
55  
56  
57  
58  
59  
60

## Abstract

**Objective:** To determine the association between pubertal stage, sex, and behavioral profile across and within neurodevelopmental disorders (NDDs) compared to typically developing (TD) youth.

**Methods:** This was a cross-sectional study from the Province of Ontario Neurodevelopmental Disorders network, including children/youth with various NDDs and TD controls. Caregivers completed the Child Behavior Checklist (CBCL). Participants were grouped into three pubertal stages: pre-pubertal (Tanner 1), early puberty (Tanner 2-3), and late puberty (Tanner 4-5). The association between pubertal stage and CBCL scores was assessed controlling for sex and diagnosis.

**Results:** The analysis included 1,043 participants (male=733; 70.3%). A three-way interaction between pubertal status, sex, and diagnosis was not significant for internalizing or externalizing behavior. Diagnosis was significantly associated with CBCL scores for both internalizing ( $p<0.0001$ ) and externalizing ( $p<0.0001$ ) behavior, with lower scores for TD children than for NDD groups. Late pubertal females showed higher levels of internalizing behavior compared to pre-puberty females ( $p=0.001$ ); males showed no differences. Early pubertal males showed lower levels of externalizing behavior compared to pre-puberty ( $p=0.01$ ); early puberty females trended toward higher levels compared to pre-puberty females ( $p=0.051$ ).

**Conclusions:** Internalizing/externalizing patterns of behaviors across pubertal stages did not differ based on diagnosis. Pubertal females are at higher risk for internalizing behaviors.

**Keywords:** Puberty, Behavior, Developmental disorders

**Key Messages:**

*What is already known on this topic:*

Existing studies of behavior and puberty in neurodevelopmental disorders have focused on small groups of children/youth within specific diagnoses and have not included typically developing controls.

*What this study adds:* Children/youth with neurodevelopmental disorders show similar patterns of behavior levels across stages of puberty compared to typically developing controls; however, they have consistently higher levels of internalizing and externalizing behavior across all stages compared to their typically developing peers. In both the neurodevelopmental and typically developing groups, females showed higher internalizing behavior (e.g. anxiety, low mood) in pubertal stages compared to pre-pubertal stages.

*How this study might affect research, practice or policy:* Clinicians should be aware of the potential for worsening mental health symptoms during puberty, particularly for females.

1  
2  
3 Parents and clinicians perceive puberty as a time of worsening mental health and  
4 behavior, particularly in children and youth with neurodevelopmental disorders (NDD).<sup>1,2</sup>  
5  
6 Surprisingly, this belief is based on little evidence. Such information is critically important to  
7  
8 provide anticipatory guidance to adolescents with NDDs and their families and to assist  
9  
10 clinicians in assessment and management of mood and behavior issues during puberty.  
11  
12

13  
14 Puberty is a period associated with biological, social, and behavioral changes.<sup>3</sup> It is also a  
15  
16 sensitive period for organization in the brain with the potential for long-lasting effects on brain  
17  
18 function and behaviour.<sup>4</sup> Bodily appearance, cognition, and behavioral systems mature at  
19  
20 different rates and are influenced by both shared and independent stimuli; disruptions in  
21  
22 coordination of these developing systems can lead to vulnerability due to mismatch of  
23  
24 motivation/arousal and the capacity to regulate thoughts, emotions, and behaviors.<sup>5</sup> These  
25  
26 individual changes occur in a social milieu, which itself affects and is affected by individual  
27  
28 pubertal processes in a complex relationship between neurodevelopment, puberty, and the social  
29  
30 environment.<sup>6</sup>  
31  
32  
33  
34

35 Youth with NDDs, such as autism spectrum disorder (ASD), attention  
36  
37 deficit/hyperactivity disorder (ADHD), and obsessive-compulsive disorder (OCD) may be at  
38  
39 additional risk for mental health issues and interfering behaviour during puberty.<sup>3,7</sup> Sex  
40  
41 differences exist in each of these disorders,<sup>8-10</sup> indicating a possible contributory role of exposure  
42  
43 to sex steroids early in development<sup>11,12</sup> and raising the possibility that hormone exposure during  
44  
45 puberty might lead to further neurodevelopmental differences. In addition, research has shown  
46  
47 that children across NDDs exhibit social difficulties.<sup>13</sup> The relationship between social  
48  
49 development and neurodevelopment during puberty suggests further vulnerability for children  
50  
51 with NDDs during this period that can have lasting impacts on neuronal organization.  
52  
53  
54  
55  
56  
57  
58  
59  
60



1  
2  
3 Despite this increased vulnerability, relatively few studies have evaluated the association  
4 between puberty and mental health/behaviour in youth with NDDs, particularly compared to  
5 typically developing (TD) groups. Case series in ASD have suggested that peri-pubertal  
6 behavioral deterioration may occur in up to one third of youth.<sup>7,14,15</sup> There is retrospective  
7 evidence that early puberty (as reported by university-aged females with ADHD) is associated  
8 with increased ADHD symptomatology,<sup>16</sup> though there is no report of symptoms through the  
9 duration of puberty. The onset of OCD in women has been linked to reproductive cycle events,  
10 including 13% of women reporting onset of OCD in the year after menarche.<sup>17</sup>  
11  
12  
13  
14  
15  
16  
17  
18  
19  
20  
21

22 These reports suggest potential vulnerability in children and youth with NDDs during  
23 puberty that extends beyond emotional and behavioural changes typically experienced during  
24 this time.<sup>18</sup> Unfortunately, all work to date has focused within specific diagnoses, limiting our  
25 ability to understand shared vulnerability during puberty across NDDs. Importantly, this  
26 information can refine guidance provided to families of adolescents with NDDs. The objective of  
27 this study was to evaluate the relationship between stage of puberty and  
28 internalizing/externalizing behavior within and across various NDDs, accounting for sex  
29 differences.  
30  
31  
32  
33  
34  
35  
36  
37  
38  
39  
40  
41

## 42 **Methods:**

### 43 *Setting and Participants*

44  
45 This was a cross-sectional study using data collected through the Ontario Brain  
46 Institute Province of Ontario Neurodevelopmental Disorders (OBI-POND) network. OBI-POND  
47 is a research collaboration across five Ontario centers (redacted names). OBI-POND enrolls  
48 children with NDDs, including ASD, ADHD, OCD, as well as typically developing (TD)  
49  
50  
51  
52  
53  
54  
55  
56  
57  
58  
59  
60

1  
2  
3 controls, at any time after their diagnosis until age 21 years, 11 months. All caregivers provided  
4 informed consent for enrollment in OBI-POND (participants who were capable provided  
5 informed consent for their participation). Participants for this analysis were enrolled between  
6  
7 February 2012 and March 2019. Participants who completed both the Child Behavior Checklist  
8 (CBCL) and the Tanner staging form at the time of enrollment were included.  
9  
10  
11  
12  
13

14  
15 Participants with a primary diagnosis of ASD, ADHD, and OCD were included in the  
16 analysis, along with TD controls. Diagnostic assessments were performed on all OBI-POND  
17 participants to confirm their reported clinical diagnosis. These included the Autism Diagnostic  
18 Observation Schedule<sup>19</sup> and the Autism Diagnostic Interview – Revised<sup>20</sup> for participants with  
19 ASD, The Schedule for Affective Disorders and Schizophrenia, Childhood Version (K-SADS)<sup>21</sup>  
20 and the Parent interview for Child Symptoms<sup>22</sup> for participants with ADHD, and the K-SADS  
21 and the Children’s Yale-Brown Obsessive Compulsive Scale for Children<sup>23</sup> for participants with  
22 OCD. Participants with sub-threshold diagnoses were excluded.  
23  
24  
25  
26  
27  
28  
29  
30  
31  
32

### 33 34 35 *Measures*

36  
37 As part of OBI-POND, all participants had caregivers complete the Child Behavior  
38 Checklist (CBCL).<sup>24</sup> The CBCL is a reliable and validated behavioral questionnaire that has been  
39 used in many observational studies.<sup>25</sup> CBCL T-scores for internalizing and externalizing  
40 behavior were used as the dependent variables in the analyses. These are norm-referenced for a  
41 general population sample in the same age-range and sex with an expected mean of 50 across all  
42 ages; as such, any effects of puberty would be above and beyond those expected based on age  
43 and sex.  
44  
45  
46  
47  
48  
49  
50  
51  
52  
53  
54  
55  
56  
57  
58  
59  
60

1  
2  
3 Participants aged eight years or older (or their caregivers when research  
4 staff/caregivers felt that participants were not able) completed a Tanner staging form (also called  
5 Sexual Maturity Rating; SMR), where penile/breast stages of growth (SOG) and pubic hair (PH)  
6 development are both reported compared to reference drawings on a scale of one (pre-pubertal)  
7 to five (post-pubertal).<sup>26</sup> Drawings used for self-assessment in a Hong-Kong sample showed  
8 substantial agreement for SOG and PH for females, with males having substantial agreement for  
9 PH and moderate agreement for SOG.<sup>27</sup> SOG and PH ratings were combined into one categorical  
10 variable representing pubertal status. Where SOG and PH scores differed by 1, the lower score  
11 was used. When scores differed by 2, the intermediate score was used. . For participants who had  
12 only reported one of PH or SOG, that stage was used as their overall Tanner rating. Tanner  
13 ratings were then recorded as pre-pubertal (stage 1), early pubertal (stages 2-3), and late pubertal  
14 (stage 4-5).

15  
16  
17  
18  
19  
20  
21  
22  
23  
24  
25  
26  
27  
28  
29  
30  
31  
32  
33  
34  
35  
36  
37  
38  
39  
40  
41  
42  
43  
44  
45  
46  
47  
48  
49  
50  
51  
52  
53  
54  
55  
56  
57  
58  
59  
60  
Pubertal staging and the CBCL were completed by 1066 participants. To ensure these  
measures were contemporaneous, 17 participants with a gap of six months or longer between the  
two measures were excluded. Six participants reported a difference of more than two stages  
between PH and SOG and were excluded due to concerns about reliability of reporting.

Sex and primary neurodevelopmental diagnosis were included as additional  
covariables in the model. Information on gender was available for <10% of our sample (77  
participants) because it was not collected as part of OBI-POND until 2019. For this reason,  
gender was not included in the analysis.

### *Analysis*

1  
2  
3 Statistical analyses were completed using SAS 9.4 (2002-2012, SAS Institute Inc.,  
4 Cary, NC, USA). Descriptive statistics were used to characterize the sample. To determine if  
5  
6 differences in internalizing and externalizing behaviors across pubertal stage varied by sex and  
7  
8 diagnosis, we tested a 3-way interaction in an ANOVA model that allowed for heterogeneous  
9  
10 variance across sex, pubertal stage, and diagnosis. After removing the non-significant 3-way  
11  
12 interaction, we assessed whether behaviors across pubertal stage varied by diagnosis across  
13  
14 males and females simultaneously by testing the pubertal stage by diagnosis 2-way interaction.  
15  
16 After dropping both the non-significant pubertal stage by diagnosis 2-way interaction and the  
17  
18 non-significant sex by diagnosis 2-way interaction, we report the differences in behaviors across  
19  
20 pubertal stages for males and females separately, across all diagnoses.  
21  
22  
23  
24  
25  
26  
27

#### 28 *Ethics approval:*

29  
30 This project received research ethics approval from Holland Bloorview Kids Rehabilitation  
31  
32 Hospital, Toronto; The Hospital for Sick Children, Toronto; McMaster Children's Hospital,  
33  
34 Hamilton; Lawson Health Research Institute, London and Queen's University, Kingston.  
35  
36 Informed consent was provided by all capable participants and by caregivers for participants who  
37  
38 were not capable of providing consent.  
39  
40  
41  
42  
43

#### 44 *Patient and Public Involvement:*

45  
46 POND has a Participant Advisory Committee (families and stakeholders from NDD community  
47  
48 groups) and a Youth Advisory Committee comprised of youth with NDDs.  
49  
50  
51

#### 52 **Results:**

1  
2  
3 The analysis included 1043 participants. Demographic information for the sample is  
4 summarized in **Table 1**. For both males ( $X^2 = 33.1$ , degrees of freedom [df] 6,  $p < 0.001$ ) and  
5 females ( $X^2 = 22$ , df 6,  $p = 0.001$ ), there were significant differences in the distribution across  
6 pubertal stages, with more pre-pubertal representation in the ADHD group. The proportion of  
7 males and females by diagnostic category differed significantly ( $X^2 = 52.4$ , df 3,  $p < 0.001$ ), with  
8 ASD and ADHD showing an expected higher proportion of males. The informant (i.e., person  
9 completing the pubertal staging) also differed between the groups, with proportionately higher  
10 self-report in the TD group compared to the NDD groups ( $X^2 = 93$ , df 6,  $p < 0.001$ ).  
11  
12  
13  
14  
15  
16  
17  
18  
19  
20  
21  
22  
23

#### 24 *Internalizing behavior*

25  
26 Results for the internalizing behavior model are presented in **Table 2** and **Figure 1**. Scores in the  
27 TD group were lower than the ASD, ADHD, and OCD groups. The three-way interaction  
28 between pubertal stage, sex, and diagnosis was not significant ( $F = 1.28$ , df 6,  $p = 0.26$ ). There  
29 was a significant interaction between sex and pubertal stage ( $F = 3.55$ , df 2,  $p = 0.03$ ). Across  
30 diagnoses, males showed no significant differences in levels of internalizing behaviors based on  
31 stage of puberty. Late pubertal females had CBCL scores that were higher by 4.4 points (95%  
32 confidence interval [CI] -1.4, 3.8;  $p = 0.001$ ) compared to pre-pubertal females. This pattern  
33 significantly differed ( $p = 0.01$ ) from the pattern in males (difference between pre- and late  
34 puberty = 0.2; 95% CI -1.8, 2.0;  $p = 0.8$ ).  
35  
36  
37  
38  
39  
40  
41  
42  
43  
44  
45  
46  
47  
48

#### 49 *Externalizing behavior*

50  
51 Results for the externalizing behavior model are presented in **Table 3** and **Figure 2**. Here again,  
52 scores for the TD group were lower than for the ASD, ADHD, and OCD groups. The three-way  
53  
54  
55  
56  
57  
58  
59  
60

1  
2  
3 interaction between pubertal stage, sex, and diagnosis was not significant ( $F = 0.59$ ,  $df 6$ ,  $p =$   
4  $0.74$ ). There was a significant interaction between sex and pubertal stage ( $F = 6.57$ ,  $df 2$ ,  
5  $p=0.002$ ). Early pubertal males showed lower levels of externalizing behavior compared to pre-  
6 pubertal males (difference  $-2.2$ , 95% CI  $-4.0$ ,  $-0.5$ ;  $p=0.01$ ). By contrast, females showed a non-  
7 significant trend toward higher levels of externalizing behavior in early puberty versus those in  
8 pre-puberty (difference  $2.8$ , 95% CI  $0$ ,  $5.7$ ,  $p=0.051$ ). The difference in these patterns between  
9 males and females was significant ( $p=0.003$ ). While both males and females show lower levels  
10 of externalizing behaviors in late puberty compared with early puberty, these differences are not  
11 statistically significant, although clinically important effects cannot be ruled out (95%CI for  
12 males  $-3.6, 0.3$  and 95%CL for females  $-4.0$  to  $1.4$ ).  
13  
14  
15  
16  
17  
18  
19  
20  
21  
22  
23  
24  
25  
26  
27

## 28 **Discussion:**

29  
30  
31 This study examined the association between pubertal stage and behavioral profile  
32 across various NDDs. Our analysis is strengthened by the presence of a TD control group. Our  
33 results show that the pattern of behaviors across pubertal stages was similar between the TD  
34 group and the NDD groups. A key distinction, however, is that the CBCL scores for the TD  
35 groups were consistently lower than for the NDD groups. Hence, although the pattern is similar,  
36 it is likely that families experience puberty as affecting children with NDDs more than their TD  
37 peers.  
38  
39  
40  
41  
42  
43  
44  
45  
46

47 Across NDD and TD groups, levels of internalizing behaviors were the same for males  
48 across the different pubertal stages, although the TD group had much lower scores. Across  
49 diagnoses, females in late puberty showed higher levels of internalizing behavior compared to  
50 their pre-pubertal counterparts, a pattern which differed significantly from their male peers. Our  
51  
52  
53  
54  
55  
56  
57  
58  
59  
60

1  
2  
3 results echo findings in the general population that have shown increases in anxiety<sup>28</sup> and  
4 depression<sup>29</sup> over the adolescent years that are greater for females compared to males. In NDD  
5 populations, Gotham, Brunwasser and Lord<sup>30</sup> measured internalizing behaviors longitudinally in  
6 adolescent groups with ASD and with developmental delays and found that increases in  
7 internalizing behaviors with age were greater for females compared to males. Pubertal stage was  
8 not measured in their analysis. Overall, these findings endorse heightened surveillance for  
9 internalizing behaviors in females with pubertal onset.

19 Our data showed lower levels of externalizing behaviors in early pubertal males  
20 compared to pre-pubertal males. This difference in levels was significantly different from the  
21 pattern in females, which showed a trend (non-significant) toward increased externalizing  
22 behaviors. Patterns for externalizing behaviors during adolescence are mixed in the existing  
23 literature. One large Dutch cross-sectional study in a general population of youth found an  
24 increasing prevalence of externalizing behaviors with each successive Tanner stage in both males  
25 and females.<sup>31</sup> An older UK-based study of levels of aggression in a typically developing  
26 population of participants found that males started with higher levels of self-reported aggression,  
27 but by late puberty there were no differences between males and females.<sup>32</sup> Verbal aggression  
28 against adults increased over the adolescent years; however, this increase was more pronounced  
29 among girls. The literature is somewhat sparser when considering NDD groups. A Swiss study of  
30 adolescents with ADHD reported decreasing aggression across the adolescent years but did not  
31 separate males and females.<sup>33</sup> A longitudinal study of children/youth with ASD showed general  
32 patterns of decreasing hyperactivity, and to a lesser extent, irritability, across the adolescent  
33 years but again did not distinguish by sex. Our results suggest that, similar to internalizing  
34 behaviors, females might be at higher risk for externalizing behaviors during adolescence. More  
35  
36  
37  
38  
39  
40  
41  
42  
43  
44  
45  
46  
47  
48  
49  
50  
51  
52  
53  
54  
55  
56  
57  
58  
59  
60

1  
2  
3 work is needed to determine the nature of these behaviors in NDD groups, such as increased  
4  
5 verbal aggression as suggested by studies of adolescents in the general population.  
6

7  
8         There are important limitations to our analysis. The data were cross-sectional and did  
9  
10 not capture individual behavioral trajectories throughout puberty. We were unable to distinguish  
11  
12 between puberty-related effects and age-related effects; to mitigate this limitation, we used  
13  
14 CBCL T-scores in order to capture pubertal effects beyond those expected based on age. This  
15  
16 analysis did not include whether puberty occurred early or late, both of which have been linked  
17  
18 to depressive symptoms in late adolescence.<sup>34</sup> Longitudinal studies measuring pubertal stage and  
19  
20 behavior are needed to optimally disentangle the effects of age and puberty, and should include  
21  
22 factors such as IQ and communication skills. Caregivers provided the majority of pubertal  
23  
24 staging, which may not be reliable, particularly for children/youth with lower support needs.  
25  
26 Both self-report and caregiver-report of Tanner stage have been shown to have good reliability in  
27  
28 typically developing females,<sup>35</sup> though self-report in males is less accurate,<sup>36</sup> particularly for  
29  
30 SOG.<sup>27</sup> Reports of Tanner staging were chosen over clinician examination to minimize the  
31  
32 intrusiveness of participation, allowing for a larger sample size, similar to other studies.<sup>31</sup> We did  
33  
34 not have access to information about gender for the vast majority of our sample. Future attention  
35  
36 should be paid to the ways in which gender, particularly non-cisgender, interacts with puberty in  
37  
38 NDDs. Finally, Tanner staging is a proxy for the internal hormonal states that are thought to  
39  
40 influence behavior;<sup>37,38</sup> fluctuations in hormonal states are not perfectly represented by external  
41  
42 appearance.  
43  
44  
45  
46  
47  
48

49         In conclusion, our analysis failed to find unique patterns of internalizing and  
50  
51 externalizing behavior in children/youth with NDDs compared to TD peers. Children with NDDs  
52  
53 had higher levels of behaviors compared to TD peers, which might accentuate caregiver  
54  
55  
56  
57  
58  
59  
60



1  
2  
3 perceptions of behavior changes during the pubertal period. Important sex differences emerged,  
4  
5 with females showing significantly higher levels of internalizing behavior at later pubertal  
6  
7 stages. Puberty represents an important milestone for adolescents both with and without NDDs,  
8  
9 and as such an important opportunity for anticipatory guidance. Our results suggest that females,  
10  
11 particularly those with NDDs, should be monitored for affective disorders. Further study is  
12  
13 needed on the associations between puberty, sex, and externalizing behaviors in NDD  
14  
15 populations. In the future, longitudinal cohort designs will allow for optimal study of the effects  
16  
17 of puberty and behaviors in NDD populations.  
18  
19  
20  
21  
22  
23  
24  
25  
26  
27  
28  
29  
30  
31  
32  
33  
34  
35  
36  
37  
38  
39  
40  
41  
42  
43  
44  
45  
46  
47  
48  
49  
50  
51  
52  
53  
54  
55  
56  
57  
58  
59  
60

**References:**

1. Autism Treatment Network. Puberty and Adolescence Resource: a Guide for Parents of Adolescents with Autism Spectrum Disorder. Autism Speaks. December 12, 2016.  
[https://www.autismspeaks.org/sites/default/files/documents/atn/puberty\\_tool\\_kit.pdf](https://www.autismspeaks.org/sites/default/files/documents/atn/puberty_tool_kit.pdf)
2. Theobald M. When ADHD Meets Puberty: One Mom's Story. *Everyday Health* blog. December 12, 2013. <http://www.everydayhealth.com/adhd/when-adhd-meets-puberty-one-moms-story.aspx>
3. Patton GC, Viner R. Pubertal transitions in health. *Lancet*. 2007;369(9567):1130-1139.
4. Gur RE, Gur, R.C. Sex differences in brain and behavior in adolescence: Findings from the Philadelphia Neurodevelopmental Cohort. *Neuroscience and Biobehavioral Reviews*. 2016;70(2016):159-70.
5. Steinberg L. Cognitive and affective development in adolescence. *Trends in cognitive sciences*. 2005;9(2):69-74.
6. Spear LP. The adolescent brain and age-related behavioral manifestations. *Neuroscience & biobehavioral reviews*. 2000;24(4):417-463.
7. Gillberg C, Steffenburg S. Outcome and prognostic factors in infantile autism and similar conditions: a population-based study of 46 cases followed through puberty. *Journal of Autism & Developmental Disorders*. 1987;17(2):273-287.
8. Lai MC, Lerch JP, Floris DL, et al. Imaging sex/gender and autism in the brain: Etiological implications. *Journal of Neuroscience Research*. 2017;95(1):380-397.
9. Loke H, Harley V, Lee J. Biological factors underlying sex differences in neurological disorders. *The International Journal of Biochemistry and Cell Biology*. 2015;65:139-50.

- 1  
2  
3 10. Mathes BM, Morabito DM, Schmidt NB. Epidemiological and clinical gender differences  
4 in OCD. *Current Psychiatry Reports*. 2019;21(5):1-7.  
5  
6  
7  
8 11. Kosidou K, Dalman C, Widman L, et al. Maternal polycystic ovary syndrome and the  
9 risk of autism spectrum disorders in the offspring: a population-based nationwide study in  
10 Sweden. *Molecular Psychiatry*. 2016;21(10):1441-8.  
11  
12  
13  
14  
15 12. Kosidou K, Dalman C, Widman L, et al. Maternal polycystic ovary syndrome and the  
16 risk for attention-deficit/hyperactivity disorder in the offspring. *Biological Psychiatry*.  
17 2016;Epub ahead of print  
18  
19  
20  
21  
22 13. Baribeau DA, Doyle-Thomas KA, Dupuis A, et al. Examining and comparing social  
23 perception abilities across childhood-onset neurodevelopmental disorders. *Journal of the*  
24 *American Academy of Child & Adolescent Psychiatry*. 2015;54(6):479-86.  
25  
26  
27  
28  
29 14. Gillberg C. Autistic children growing up: problems during puberty and adolescence.  
30 *Developmental Medicine & Child Neurology*. 1984;26(1):125-129.  
31  
32  
33  
34 15. Gillberg C, Schaumann H. Infantile autism and puberty. *Journal of Autism &*  
35 *Developmental Disorders*. 1981;11(4):365-371.  
36  
37  
38  
39 16. Ostojic D, Miller, C.J. Association between pubertal onset and symptoms of ADHD in  
40 female university students. *Journal of Attention Disorders*. 2014;  
41  
42  
43 17. Guglielmi V, Vulink, N.C., Denys, D., Wang, Y., Samuels, J.F., Nestadt, G. Obsessive-  
44 compulsive disorder and female reproductive cycle events: results from the OCD and  
45 reproduction collaborative study. *Depression and Anxiety*. 2014;31(12):979-87.  
46  
47  
48  
49 18. Rutter M, Graham, P, Chadwick, OFD, Yule, W. Adolescent turmoil: fact or fiction?  
50 *Journal of Child Psychology and Psychiatry*. 1976;17(1):35-56.  
51  
52  
53  
54  
55  
56  
57  
58  
59  
60

- 1  
2  
3 19. Lord C, Rutter M, Dilavore P, Risi S, Gotham K, Bishop S. *Autism Diagnostic*  
4  
5 *Observation Schedule, Second Edition*. WPS; 2012.  
6  
7  
8 20. Rutter M, Lecouteur A, Lord C. *Autism Diagnostic Interview - Revised (ADI-R)*. WPS;  
9  
10 2003.  
11  
12 21. Ambrosini PJ. Historical development and present status of the Schedule for Affective  
13  
14 Disorders and Schizophrenia for School-Age Children (K-SADS). *Journal of the American*  
15  
16 *Academy of Child & Adolescent Psychiatry*. 2000;39(1):49-58.  
17  
18  
19 22. Ickowicz A, Schachar RJ, Sugarman R, Chen SX, Millette C, Cook L. The parent  
20  
21 interview for child symptoms: a situation-specific clinical research interview for attention-deficit  
22  
23 hyperactivity and related disorders. *The Canadian Journal of Psychiatry*. 2006;51(5):325-328.  
24  
25  
26 23. Scahill L, Riddle MA, McSwiggin-Hardin M, et al. Children's Yale-Brown Obsessive  
27  
28 Compulsive Scale: reliability and validity. *J Am Acad Child Adolesc Psychiatry*. 1997;36(6):844-  
29  
30 52.  
31  
32  
33 24. Achenbach TM, Rescorla LA. *Manual for the ASEBA school-age forms and profiles*.  
34  
35 University of Vermont Research Centre for Children, Youth & Families; 2001.  
36  
37  
38 25. NICHD Early Child Care Research Network. Child care and child development: Results  
39  
40 from the NICHD study of early child care and youth development. U. S. Department of Health  
41  
42 and Human Services,. Accessed October 22, 2018.  
43  
44 [https://www.nichd.nih.gov/sites/default/files/publications/pubs/documents/seccyd\\_06.pdf](https://www.nichd.nih.gov/sites/default/files/publications/pubs/documents/seccyd_06.pdf)  
45  
46  
47 26. Morris NM & Udry JR. Validation of a self-administered instrument to assess stage of  
48  
49 adolescent development. *Journal of Youth & Adolescence*. 1980;9(3):271-280.  
50  
51  
52  
53  
54  
55  
56  
57  
58  
59  
60

- 1  
2  
3 27. Chan NPT, Sung RYT, Kong APS, Goggins WB, So HK, Nelson EAS. Reliability of  
4 pubertal self-assessment in Hong Kong Chinese children. *Journal of Paediatrics and Child*  
5 *Health*. 2008;44:353-8.  
6  
7  
8  
9  
10 28. Essau CA, Conradt J, Petermann F. Frequency, comorbidity, and psychosocial  
11 impairment of anxiety disorders in German adolescents. *Journal of Anxiety Disorders*.  
12 2000;14(3):263-279.  
13  
14  
15  
16  
17 29. Hankin BL, Abramson LY, Moffitt TE, Silva PA, McGee R, Angell KE. Development of  
18 depression from preadolescence to young adulthood: emerging gender differences in a 10-year  
19 longitudinal study. *Journal of Abnormal Psychology*. 1998;107(1):128.  
20  
21  
22  
23  
24 30. Gotham K, Brunwasser SM, Lord C. Depressive and anxiety symptom trajectories from  
25 school age through young adulthood in samples with autism spectrum disorder and  
26 developmental delay. *Journal of the American Academy of Child & Adolescent Psychiatry*.  
27 2015;54(5):369-376.e3. doi:10.1016/j.jaac.2015.02.005  
28  
29  
30  
31  
32  
33 31. Oldehinkel AJ, Verhulst FC, Ormel J. Mental health problems during puberty: Tanner  
34 stage-related differences in specific symptoms. The TRAILS study. *Journal of adolescence*.  
35 2011;34(1):73-85.  
36  
37  
38  
39  
40 32. Finkelstein JW, Von Eye A, Preece MA. The relationship between aggressive behavior  
41 and puberty in normal adolescents: A longitudinal study. *Journal of Adolescent Health*.  
42 1994;15(4):319-326.  
43  
44  
45  
46  
47 33. Murray AL, Obsuth I, Zirk-Sadowski J, Ribeaud D, Eisner M. Developmental relations  
48 between ADHD symptoms and reactive versus proactive aggression across childhood and  
49 adolescence. *Journal of attention disorders*. 2020;24(12):1701-1710.  
50  
51  
52  
53  
54  
55  
56  
57  
58  
59  
60

- 1  
2  
3 34. Benoit A, Lacourse E, Claes M. Pubertal timing and depressive symptoms in late  
4 adolescence: The moderating role of individual, peer, and parental factors. *Development and*  
5  
6 *Psychopathology*. 2013;25(2):455-471.  
7  
8  
9  
10 35. Brooks-Gunn J, Warren MP, Rosso J, Gargiulo J. Validity of self-report measures of  
11 girls' pubertal status. *Child development*. 1987;58(3):829-841.  
12  
13  
14 36. Neinstein LS. Adolescent self-assessment of sexual maturation: reassessment and  
15 evaluation in a mixed ethnic urban population. *Clinical pediatrics*. 1982;21(8):482-484.  
16  
17  
18 37. Brooks-Gunn J, Warren MP. Biological and social contributions to negative affect in  
19 young adolescent girls. *Child development*. 1989;60(1):40-55.  
20  
21  
22  
23 38. Olweus D, Mattsson A, Schalling D, Low H. Testosterone, aggression, physical, and  
24 personality dimensions in normal adolescent males. *Psychosomatic medicine*. 1980;42(2):253-  
25  
26  
27  
28 269.  
29  
30  
31  
32  
33  
34  
35  
36  
37  
38  
39  
40  
41  
42  
43  
44  
45  
46  
47  
48  
49  
50  
51  
52  
53  
54  
55  
56  
57  
58  
59  
60

Table 1: Sample Characteristics

|                                     | Typically Developing |            | ASD         |             | ADHD        |             | OCD         |             |
|-------------------------------------|----------------------|------------|-------------|-------------|-------------|-------------|-------------|-------------|
|                                     | Male                 | Female     | Male        | Female      | Male        | Female      | Male        | Female      |
| n                                   | 78                   | 53         | 351         | 100         | 226         | 79          | 78          | 78          |
| Race/ethnicity n (% of non-missing) |                      |            |             |             |             |             |             |             |
| Arab                                | 1 (1)                | 0          | 2 (1)       | 1 (1)       | 4 (3)       | 1 (2)       | 2 (4)       | 0           |
| Black                               | 3 (4)                | 1 (2)      | 16 (7)      | 1 (1)       | 4 (3)       | 6 (10)      | 0           | 2 (5)       |
| Chinese                             | 7 (9)                | 4 (8)      | 7 (3)       | 4 (6)       | 6 (4)       | 2 (3)       | 1 (2)       | 1 (3)       |
| East Asian                          | 1 (1)                | 0          | 1 (<1)      | 0           | 0           | 0           | 2 (4)       | 0           |
| Indigenous                          | 1 (1)                | 0          | 14 (6)      | 4 (6)       | 5 (3)       | 5 (8)       | 1 (2)       | 0           |
| Japanese                            | 2 (3)                | 1 (2)      | 1 (<1)      | 0           | 0           | 0           | 0           | 0           |
| Jewish                              | 1 (1)                | 1 (2)      | 10 (4)      | 3 (4)       | 19 (13)     | 8 (13)      | 1 (2)       | 1 (3)       |
| Korean                              | 0                    | 1 (2)      | 0           | 1 (1)       | 0           | 0           | 2 (4)       | 0           |
| American/Hispanic                   | 5 (6)                | 0          | 11 (5)      | 0           | 7 (5)       | 1 (2)       | 0           | 2 (5)       |
| South Asian                         | 4 (5)                | 3 (6)      | 5 (2)       | 2 (3)       | 4 (3)       | 2 (3)       | 5 (11)      | 0           |
| Southeast Asian                     | 0                    | 1 (2)      | 2 (1)       | 2 (3)       | 0           | 1 (2)       | 0           | 0           |
| West Asian                          | 0                    | 0          | 2 (1)       | 0           | 4 (3)       | 1 (2)       | 3 (6)       | 0           |
| White                               | 60 (77)              | 47 (89)    | 195 (83)    | 57 (83)     | 116 (78)    | 51 (84)     | 42 (89)     | 34 (89)     |
| Missing Ethnicity                   | 0                    | 0          | 115 (33)    | 31 (31)     | 77 (34)     | 18 (23)     | 31 (40)     | 40 (51)     |
| Informant, n (%)                    |                      |            |             |             |             |             |             |             |
| Missing                             | 4 (5)                | 3 (6)      | 16 (5)      | 7 (7)       | 15 (7)      | 3 (4)       | 4 (5)       | 2 (3)       |
| Parent                              | 25 (32)              | 21 (40)    | 269 (77)    | 70 (70)     | 165 (73)    | 59 (75)     | 56 (72)     | 53 (68)     |
| Self                                | 49 (63)              | 29 (55)    | 66 (19)     | 23 (23)     | 46 (20)     | 17 (22)     | 18 (23)     | 23 (29)     |
|                                     | Mean (sd)            |            |             |             |             |             |             |             |
| Age                                 | 12.4 (2.7)           | 12.9 (3.2) | 12.4 (2.9)  | 12.6 (3.0)  | 11.0 (2.5)  | 10.8 (2.4)  | 12.6 (2.6)  | 13.5 (2.5)  |
| Pre puberty                         | 9.7 (1.3)            | 9.7 (1.2)  | 10.1 (1.4)  | 9.8 (1.2)   | 9.9 (1.5)   | 9.4 (0.9)   | 10.5 (1.5)  | 10.4 (1.5)  |
| Early Puberty                       | 12.7 (1.6)           | 12.7 (1.3) | 12.6 (2.0)  | 11.5 (1.9)  | 12.3 (1.7)  | 11.3 (1.1)  | 12.9 (2.0)  | 13.0 (2.0)  |
| Late Puberty                        | 15.3 (1.8)           | 16.1 (2.4) | 15.8 (1.8)  | 15.1 (2.5)  | 15.6 (1.6)  | 14.5 (2.6)  | 15.7 (1.3)  | 15.3 (1.3)  |
| CBCL Externalizing                  | 42.7 (8.9)           | 42.5 (7.8) | 56.5 (10.6) | 57.1 (8.9)  | 61.0 (10.7) | 61.0 (10.6) | 49.6 (10.9) | 53.5 (10.7) |
| Pre puberty                         | 45.2 (9.7)           | 39.7 (7.3) | 58.8 (10.9) | 56.6 (10.2) | 61.6 (10.7) | 59.4 (10.1) | 51.5 (13.3) | 54.3 (5.8)  |
| Early Puberty                       | 41.9 (9.4)           | 43.9 (8.7) | 55.7 (9.9)  | 56.9 (9.6)  | 61.7 (10.0) | 63.5 (10.8) | 48.1 (10.0) | 55.4 (11.0) |
| Late Puberty                        | 41.0 (6.7)           | 43.9 (7.4) | 54.6 (10.3) | 57.6 (7.8)  | 56.4 (12.0) | 59.8 (11.0) | 49.2 (8.6)  | 52.0 (11.9) |
| CBCL Internalizing                  | 47.2 (9.0)           | 47.3 (9.3) | 62.5 (9.4)  | 62.6 (9.6)  | 61.0 (10.3) | 60.3 (11.4) | 63.5 (10.9) | 63.7 (10.0) |
| Pre puberty                         | 48.5 (9.0)           | 44.7 (8.2) | 62.6 (9.7)  | 57.9 (10.5) | 60.4 (10.6) | 58.1 (10.4) | 63.5 (10.4) | 64.1 (7.5)  |

|               |            |                |            |            |             |             |             |             |
|---------------|------------|----------------|------------|------------|-------------|-------------|-------------|-------------|
| Early Puberty | 47.8 (9.7) | 45.2 (8.9)     | 62.0 (9.3) | 62.3 (7.3) | 61.6 (10.0) | 62.2 (12.1) | 64.0 (8.9)  | 64.4 (8.0)  |
| Late Puberty  | 45.1 (7.9) | 51.2<br>(10.5) | 63.0 (9.3) | 65.3 (9.5) | 62.5 (9.4)  | 59.8 (11.4) | 62.8 (10.9) | 63.0 (12.1) |

Child-level ethnicity data were not collected from study inception, leading to a high level of missing data. More than one ethnicity could be reported, meaning percentages will not sum to 100%. Pre-puberty: Tanner stage 1; Early puberty: Tanner stages 2-3; Late puberty: Tanner stages 4-5. CBCL scores represent T-scores. ADHD: attention-deficit/hyperactivity disorder; ASD: autism spectrum disorder; CBCL: Child Behavior Checklist; OCD: obsessive compulsive disorder; sd: standard deviation

Confidential: For Review Only



**Table 2: Multivariable linear regression<sup>1</sup> CBCL internalizing behavior predicted scores and score differences**

|                          |      | Puberty stages    |                   |                   | Puberty stage differences |                  |                   |
|--------------------------|------|-------------------|-------------------|-------------------|---------------------------|------------------|-------------------|
|                          |      | Pre-puberty       | Early Puberty     | Late puberty      | Pre to Early              | Early to Late    | Pre to Late       |
| <b>Males</b>             |      |                   |                   |                   |                           |                  |                   |
|                          | TD   | 47.2 (45.3, 49.1) | 47.4 (45.4, 49.3) | 47.4 (45.4, 49.5) |                           |                  |                   |
|                          | ASD  | 62.4 (61.1, 63.7) | 62.5 (61.1, 63.9) | 62.6 (61.1, 64.1) | 0.1 (-1.5, 1.8)           | 0.1 (-1.8, 2.0)  | 0.2 (-1.6, 2.0)   |
|                          | ADHD | 61.0 (59.5, 62.4) | 61.1 (59.5, 62.7) | 61.2 (59.3, 63.0) |                           |                  |                   |
|                          | OCD  | 63.3 (61.3, 65.2) | 63.4 (61.4, 65.4) | 63.5 (61.4, 65.6) |                           |                  |                   |
| <b>Females</b>           |      |                   |                   |                   |                           |                  |                   |
|                          | TD   | 44.5 (42.1, 46.9) | 47.7 (45.3, 50.1) | 48.9 (46.7, 51.2) |                           |                  |                   |
|                          | ASD  | 59.7 (57.5, 61.9) | 62.9 (60.8, 65.0) | 64.1 (62.2, 66.0) | 3.2 (0.4, 6.0)            | 1.2 (-1.4, 3.8)  | 4.4 (1.7, 7.1)    |
|                          | ADHD | 58.2 (56.0, 60.5) | 61.5 (59.2, 63.7) | 62.7 (60.5, 64.8) | <i>p</i> = .025           |                  | <i>p</i> = .001   |
|                          | OCD  | 60.6 (58.1, 63.1) | 63.8 (61.4, 66.1) | 65.0 (62.9, 67.1) |                           |                  |                   |
| <b>Males vs. Females</b> |      |                   |                   |                   |                           |                  |                   |
|                          |      |                   |                   |                   | -3.1 (-6.3, 0.2)          | -1.1 (-4.4, 2.1) | -4.2 (-7.4, -1.0) |
|                          |      |                   |                   |                   |                           |                  | <i>p</i> = .010   |

<sup>1</sup> Pubertal stage ( $F(2,1034) = 4.1, p = .02$ ); Sex ( $F(1,1034) = 0.2, p = 0.7$ ); Diagnosis ( $F(3,1034) = 100.7, p < .0001$ ); Sex x Pubertal stage ( $F(2,1034) = 3.6, p = .03$ )

Pre-puberty: Tanner stage 1; Early puberty: Tanner stages 2-3; Late puberty: Tanner stages 4-5. ADHD: attention-deficit/hyperactivity disorder; ASD: autism spectrum disorder; CBCL: Child Behavior Checklist; OCD: obsessive compulsive disorder; TD: typically developing

**Table 3: Multivariable linear regression<sup>1</sup> CBCL externalizing behavior predicted scores and score differences**

|                          | Pre-puberty       | Puberty stages    |                   | Puberty stage differences |                  |                   |
|--------------------------|-------------------|-------------------|-------------------|---------------------------|------------------|-------------------|
|                          |                   | Early Puberty     | Late puberty      | Pre to Early              | Early to Late    | Pre to Late       |
| <b>Males</b>             |                   |                   |                   |                           |                  |                   |
| TD                       | 44.2 (42.4, 46.0) | 42.0 (40.1, 43.8) | 40.3 (38.3, 42.3) |                           |                  |                   |
| ASD                      | 58.3 (57.0, 59.7) | 56.1 (54.6, 57.5) | 54.4 (52.9, 56.0) | -2.2 (-4.0, -0.5)         | -1.7 (-3.6, 0.3) | -3.9 (-5.8, -2.0) |
| ADHD                     | 62.2 (60.7, 63.6) | 59.9 (58.3, 61.6) | 58.3 (56.4, 60.2) | <i>p</i> = .010           |                  | <i>p</i> < .0001  |
| OCD                      | 52.9 (50.8, 55.0) | 50.7 (48.6, 52.8) | 49.0 (46.8, 51.2) |                           |                  |                   |
| <b>Females</b>           |                   |                   |                   |                           |                  |                   |
| TD                       | 41.8 (39.5, 44.1) | 44.6 (42.3, 47.0) | 43.3 (41.2, 45.5) |                           |                  |                   |
| ASD                      | 55.9 (53.7, 58.2) | 58.8 (56.6, 61.0) | 57.5 (55.5, 59.4) | 2.8 (0.0, 5.7)            | -1.3 (-4.0, 1.4) | 1.5 (-1.2, 4.3)   |
| ADHD                     | 59.8 (57.5, 62.0) | 62.6 (60.3, 64.9) | 61.3 (59.1, 63.5) |                           |                  |                   |
| OCD                      | 50.5 (47.9, 53.1) | 53.3 (50.9, 55.8) | 52.0 (49.8, 54.3) |                           |                  |                   |
| <b>Males vs. Females</b> |                   |                   |                   |                           |                  |                   |
|                          |                   |                   |                   | -5.1 (-8.4, -1.8)         | -0.4 (-3.7, 2.9) | -5.4 (-8.7, -2.2) |
|                          |                   |                   |                   | <i>p</i> = .003           |                  | <i>p</i> = .001   |

<sup>1</sup> Pubertal stage ( $F(2,1034) = 1.7, p = .2$ ); Sex ( $F(1,1034) = 2.44, p = 0.1$ ); Diagnosis ( $F(3,1034) = 129, p < .0001$ ); Sex x Pubertal stage ( $F(2,1034) = 6.6, p = .002$ )

Pre-puberty: Tanner stage 1; Early puberty: Tanner stages 2-3; Late puberty: Tanner stages 4-5. ADHD: attention-deficit/hyperactivity disorder; ASD: autism spectrum disorder; CBCL: Child Behavior Checklist; OCD: obsessive compulsive disorder; TD: typically developing

1  
2  
3  
4  
5  
6  
7  
8  
9  
10  
11  
12  
13  
14  
15  
16  
17  
18  
19  
20  
21  
22  
23  
24  
25  
26  
27  
28  
29  
30  
31  
32  
33  
34  
35  
36  
37  
38  
39  
40  
41  
42  
43  
44  
45  
46  
47

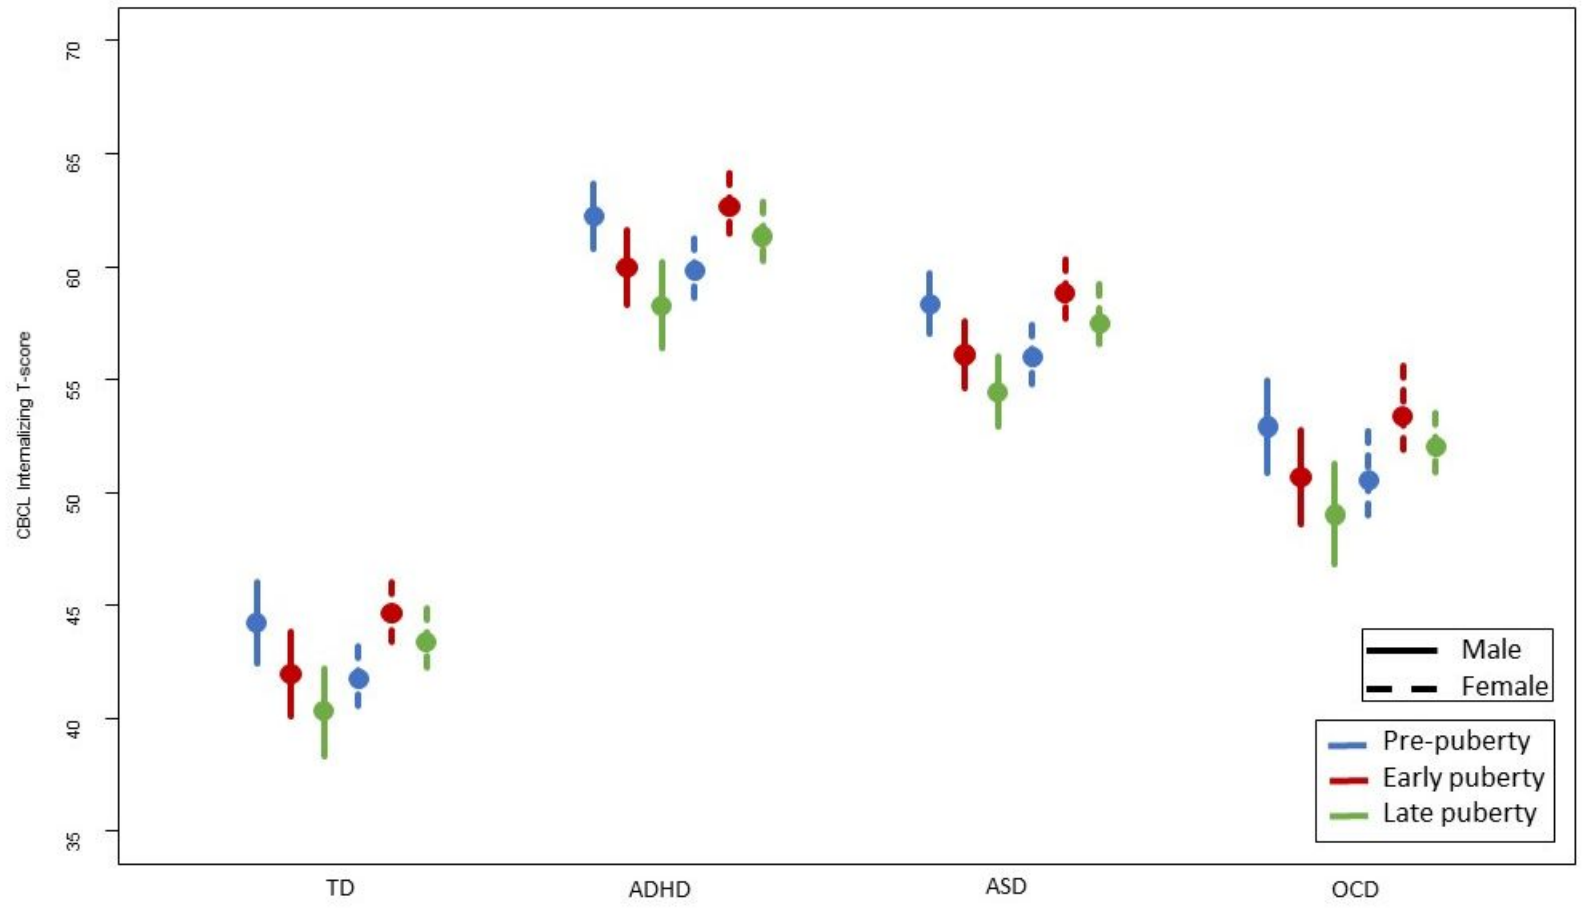

**Figure 1: CBCL Internalizing scores by pubertal stage, sex, and diagnosis.** ADHD: attention-deficit/hyperactivity disorder; ASD: autism spectrum disorder; OCD: obsessive compulsive disorder; TD: typical development.

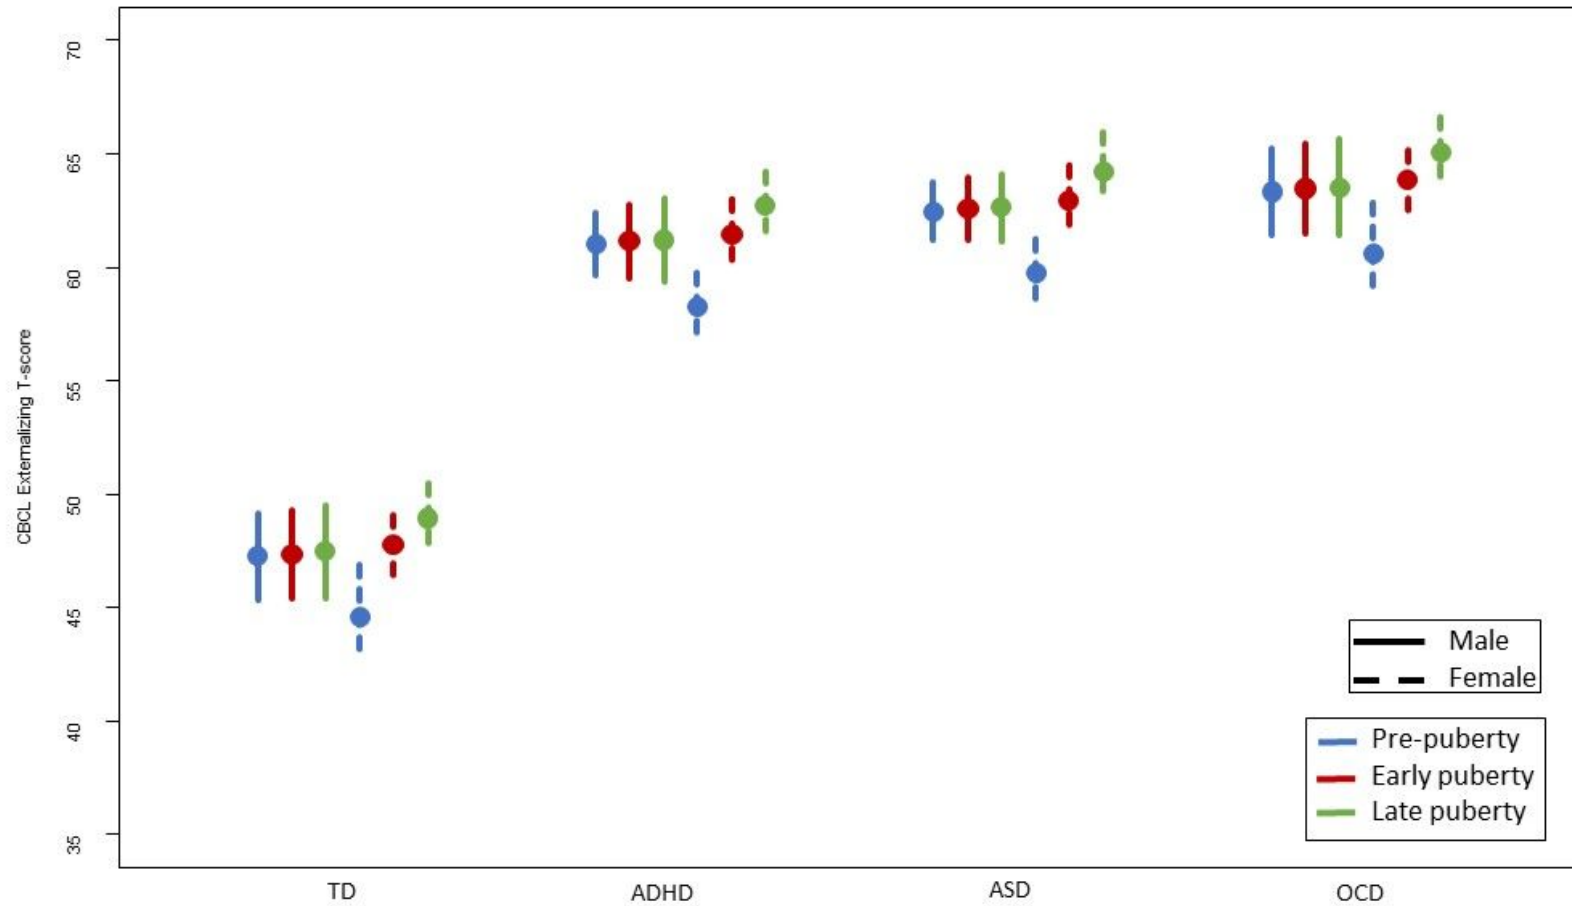

**Figure 2: CBCL Externalizing scores by pubertal stage, sex, and diagnosis.** ADHD: attention-deficit/hyperactivity disorder; ASD: autism spectrum disorder; OCD: obsessive compulsive disorder; TD: typical development.

# BMJ Paediatrics Open

## Pubertal stage, sex, and behavior in neurodevelopmental disorders versus typical development: a cross-sectional study

|                               |                                                                                                                                                                                                                                                                                                                                                                                                                                                                                                                                                                                                                                                                                                                         |
|-------------------------------|-------------------------------------------------------------------------------------------------------------------------------------------------------------------------------------------------------------------------------------------------------------------------------------------------------------------------------------------------------------------------------------------------------------------------------------------------------------------------------------------------------------------------------------------------------------------------------------------------------------------------------------------------------------------------------------------------------------------------|
| Journal:                      | <i>BMJ Paediatrics Open</i>                                                                                                                                                                                                                                                                                                                                                                                                                                                                                                                                                                                                                                                                                             |
| Manuscript ID                 | bmjpo-2022-001469.R2                                                                                                                                                                                                                                                                                                                                                                                                                                                                                                                                                                                                                                                                                                    |
| Article Type:                 | Original research                                                                                                                                                                                                                                                                                                                                                                                                                                                                                                                                                                                                                                                                                                       |
| Date Submitted by the Author: | 06-May-2022                                                                                                                                                                                                                                                                                                                                                                                                                                                                                                                                                                                                                                                                                                             |
| Complete List of Authors:     | Penner, Melanie; Holland Bloorview Kids Rehabilitation Hospital, ; University of Toronto Faculty of Medicine, Paediatrics<br>Dupuis, Annie; University of Toronto Dalla Lana School of Public Health<br>Arnold, Paul; Hotchkiss Brain Institute<br>Ayub, Muhammad; Queen's University, Psychiatry<br>Crosbie, Jennifer; The Hospital for Sick Children, Psychiatry<br>Georgiades, Stelios; McMaster University, Department of Psychiatry and Behavioural Neurosciences<br>Kelley, Elizabeth; Queen's University, Psychology<br>Nicolson, Robert; Western University, Psychiatry<br>Schachar, Russell; The Hospital for Sick Children, Psychiatry<br>Anagnostou, Evdokia; Holland Bloorview Kids Rehabilitation Hospital |
| Keywords:                     | Adolescent Health, Child Psychiatry                                                                                                                                                                                                                                                                                                                                                                                                                                                                                                                                                                                                                                                                                     |
|                               |                                                                                                                                                                                                                                                                                                                                                                                                                                                                                                                                                                                                                                                                                                                         |

SCHOLARONE™  
Manuscripts

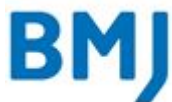

I, the Submitting Author has the right to grant and does grant on behalf of all authors of the Work (as defined in the below author licence), an exclusive licence and/or a non-exclusive licence for contributions from authors who are: i) UK Crown employees; ii) where BMJ has agreed a CC-BY licence shall apply, and/or iii) in accordance with the terms applicable for US Federal Government officers or employees acting as part of their official duties; on a worldwide, perpetual, irrevocable, royalty-free basis to BMJ Publishing Group Ltd ("BMJ") its licensees and where the relevant Journal is co-owned by BMJ to the co-owners of the Journal, to publish the Work in this journal and any other BMJ products and to exploit all rights, as set out in our [licence](#).

The Submitting Author accepts and understands that any supply made under these terms is made by BMJ to the Submitting Author unless you are acting as an employee on behalf of your employer or a postgraduate student of an affiliated institution which is paying any applicable article publishing charge ("APC") for Open Access articles. Where the Submitting Author wishes to make the Work available on an Open Access basis (and intends to pay the relevant APC), the terms of reuse of such Open Access shall be governed by a Creative Commons licence – details of these licences and which [Creative Commons](#) licence will apply to this Work are set out in our licence referred to above.

Other than as permitted in any relevant BMJ Author's Self Archiving Policies, I confirm this Work has not been accepted for publication elsewhere, is not being considered for publication elsewhere and does not duplicate material already published. I confirm all authors consent to publication of this Work and authorise the granting of this licence.

1  
2  
3 **Pubertal stage, sex, and behavior in neurodevelopmental disorders versus typical**  
4  
5 **development: a cross-sectional study**  
6  
7

8 **Authors:**  
9

- 10  
11  
12 1. Melanie Penner MD MSc FRCP(C): Bloorview Research Institute, Holland Bloorview  
13 Kids Rehabilitation Hospital, 150 Kilgour Rd., Toronto, Ontario, Canada; Department of  
14 Paediatrics, University of Toronto, 555 University Ave., Toronto, Ontario, Canada;  
15  
16 mpenner@hollandbloorview.ca  
17  
18  
19  
20  
21 2. Annie Dupuis PhD: Dalla Lana School of Public Health, University of Toronto, 155  
22 College St., Toronto, Ontario, Canada; [annie.dupuis@mdstats.ca](mailto:annie.dupuis@mdstats.ca)  
23  
24  
25  
26 3. Paul Arnold MD PhD FRCP(C): The Mathison Centre for Mental Health Research &  
27 Education, Hotchkiss Brain Institute, Cumming School of Medicine, University of  
28 Calgary. 4D60, Teaching, Research and Wellness (TRW) Building, 3280 Hospital Dr  
29 NW, Calgary AB, Canada. T2N 4Z6. [Paul.arnold@ucalgary.ca](mailto:Paul.arnold@ucalgary.ca)  
30  
31  
32  
33  
34  
35 4. Muhammad Ayub MBBS MRCPsych MSc MD: Department of Psychiatry, Queen's  
36 University, 191 Portsmouth Ave, Kingston, Ontario, Canada; Department of Psychiatry,  
37 University College London, London, UK; [ma84@queensu.ca](mailto:ma84@queensu.ca)  
38  
39  
40  
41  
42 5. Jennifer Crosbie PhD: Department of Psychiatry, Hospital for Sick Children, 555  
43 University Ave., Toronto, Ontario, Canada; [jennifer.crosbie@sickkids.ca](mailto:jennifer.crosbie@sickkids.ca)  
44  
45  
46  
47 6. Stelios Georgiades PhD: Department of Psychiatry and Behavioural Neurosciences,  
48 McMaster University, 175 Longwood Ave. S., Hamilton, Ontario, Canada;  
49  
50  
51 [georgis@mcmaster.ca](mailto:georgis@mcmaster.ca)  
52  
53  
54 7. Elizabeth Kelley PhD: Department of Psychology, Queen's University, 62 Arch St.  
55  
56  
57  
58  
59  
60

- 1  
2  
3 8. Robert Nicolson MD FRCP(C): Department of Psychiatry, Western University,  
4 Parkwood Institute, Mental Health Care Building, London, Ontario, Canada;  
5  
6 [micolso@uwo.ca](mailto:micolso@uwo.ca)  
7  
8  
9  
10 9. Russell Schachar MD FRCP(C): Department of Psychiatry, Hospital for Sick Children,  
11 555 University Ave., Toronto, Ontario, Canada; [russell.schachar@sickkids.ca](mailto:russell.schachar@sickkids.ca)  
12  
13  
14 10. Evdokia Anagnostou MD: Bloorview Research Institute, Holland Bloorview Kids  
15 Rehabilitation Hospital, 150 Kilgour Rd., Toronto, Ontario, Canada; Department of  
16 Paediatrics, University of Toronto, 555 University Ave., Toronto, Ontario, Canada;  
17  
18 [eanagnostou@hollandbloorview.ca](mailto:eanagnostou@hollandbloorview.ca)  
19  
20  
21  
22  
23  
24  
25  
26

27 **Address correspondence to:** Melanie Penner, Child Development Program, Holland Bloorview  
28 Kids Rehabilitation Hospital, 150 Kilgour Rd., Toronto, Ontario, M4G 1R8,  
29 [mpenner@hollandbloorview.ca](mailto:mpenner@hollandbloorview.ca), 416-425-6220  
30  
31  
32  
33

34 **Word count:** 2498  
35  
36  
37

38 **Funding:** This research was conducted with the support of the Ontario Brain Institute (POND,  
39 PIs: Anagnostou/Lerch; award number: Not Applicable), an independent non-profit corporation,  
40 funded partially by the Ontario government. The opinions, results and conclusions are those of  
41 the authors and no endorsement by the Ontario Brain Institute is intended or should be inferred.  
42  
43 The funding body has not directly influenced the research question, data analysis, or  
44  
45 interpretation of the findings of this study.  
46  
47  
48  
49  
50  
51  
52  
53  
54  
55  
56  
57  
58  
59  
60



## Abstract

**Objective:** To determine the association between pubertal stage, sex, and behavioral profile across and within neurodevelopmental disorders (NDDs) compared to typically developing (TD) youth.

**Methods:** This was a cross-sectional study from the Province of Ontario Neurodevelopmental Disorders network, including children/youth with various NDDs and TD controls. Caregivers completed the Child Behavior Checklist (CBCL). Participants were grouped into three pubertal stages: pre-pubertal (Tanner 1), early puberty (Tanner 2-3), and late puberty (Tanner 4-5). The association between pubertal stage and CBCL scores was assessed controlling for sex and diagnosis.

**Results:** The analysis included 1,043 participants (male=733; 70.3%). A three-way interaction between pubertal status, sex, and diagnosis was not significant for internalizing or externalizing behavior. Diagnosis was significantly associated with CBCL scores for both internalizing ( $p<0.0001$ ) and externalizing ( $p<0.0001$ ) behavior, with lower scores for TD children than for NDD groups. Late pubertal females showed higher levels of internalizing behavior compared to pre-puberty females ( $p=0.001$ ); males showed no differences. Early pubertal males showed lower levels of externalizing behavior compared to pre-puberty ( $p=0.01$ ); early puberty females trended toward higher levels compared to pre-puberty females ( $p=0.051$ ).

**Conclusions:** Internalizing/externalizing patterns of behaviors across pubertal stages did not differ based on diagnosis. Pubertal females are at higher risk for internalizing behaviors.

**Keywords:** Puberty, Behavior, Developmental disorders

**Key Messages:**

*What is already known on this topic:*

Existing studies of behavior and puberty in neurodevelopmental disorders have focused on small groups of children/youth within specific diagnoses and have not included typically developing controls.

*What this study adds:* Children/youth with neurodevelopmental disorders show similar patterns of behavior levels across stages of puberty compared to typically developing controls; however, they have consistently higher levels of internalizing and externalizing behavior across all stages compared to their typically developing peers. In both the neurodevelopmental and typically developing groups, females showed higher internalizing behavior (e.g. anxiety, low mood) in pubertal stages compared to pre-pubertal stages.

*How this study might affect research, practice or policy:* Clinicians should be aware of the potential for worsening mental health symptoms during puberty, particularly for females.

1  
2  
3 Parents and clinicians perceive puberty as a time of worsening mental health and  
4 behavior, particularly in children and youth with neurodevelopmental disorders (NDDs).<sup>1,2</sup>  
5 Surprisingly, this belief is based on little evidence. Such information is critically important to  
6 provide anticipatory guidance to adolescents with NDDs and their families and to assist  
7 clinicians in assessment and management of mood and behavior issues during puberty.  
8  
9

10 Puberty is a period associated with biological, social, and behavioral changes.<sup>3</sup> It is also a  
11 sensitive period for organization in the brain with the potential for long-lasting effects on brain  
12 function and behaviour.<sup>4</sup> Bodily appearance, cognition, and behavioral systems mature at  
13 different rates and are influenced by both shared and independent stimuli; disruptions in  
14 coordination of these developing systems can lead to vulnerability due to mismatch of  
15 motivation/arousal and the capacity to regulate thoughts, emotions, and behaviors.<sup>5</sup> These  
16 individual changes occur in a social milieu, which itself affects and is affected by individual  
17 pubertal processes in a complex relationship between neurodevelopment, puberty, and the social  
18 environment.<sup>6</sup>  
19  
20  
21  
22  
23  
24  
25  
26  
27  
28  
29  
30  
31  
32  
33  
34

35 Youth with NDDs, such as autism spectrum disorder (ASD), attention  
36 deficit/hyperactivity disorder (ADHD), and obsessive-compulsive disorder (OCD) may be at  
37 additional risk for mental health issues and interfering behaviour during puberty.<sup>3,7</sup> Sex  
38 differences exist in each of these disorders,<sup>8-10</sup> indicating a possible contributory role of exposure  
39 to sex steroids early in development<sup>11,12</sup> and raising the possibility that hormone exposure during  
40 puberty might lead to further neurodevelopmental differences. In addition, research has shown  
41 that children across NDDs exhibit social difficulties.<sup>13</sup> The relationship between social  
42 development and neurodevelopment during puberty suggests further vulnerability for children  
43 with NDDs during this period that can have lasting impacts on neuronal organization.  
44  
45  
46  
47  
48  
49  
50  
51  
52  
53  
54  
55  
56  
57  
58  
59  
60

1  
2  
3 Despite this increased vulnerability, few studies have evaluated the association between  
4  
5  
6  
7  
8  
9  
10  
11  
12  
13  
14  
15  
16  
17  
18  
19  
20  
21  
22  
23  
24  
25  
26  
27  
28  
29  
30  
31  
32  
33  
34  
35  
36  
37  
38  
39  
40  
41  
42  
43  
44  
45  
46  
47  
48  
49  
50  
51  
52  
53  
54  
55  
56  
57  
58  
59  
60  
Despite this increased vulnerability, few studies have evaluated the association between  
puberty and mental health/behaviour in youth with NDDs, particularly compared to typically  
developing (TD) groups. Case series in ASD have suggested that peri-pubertal behavioral  
deterioration may occur in up to one third of youth.<sup>7,14,15</sup> There is retrospective evidence that  
early puberty (as reported by university-aged females with ADHD) is associated with increased  
ADHD symptomatology,<sup>16</sup> though there is no report of symptoms through the duration of  
puberty. The onset of OCD in women has been linked to reproductive cycle events, including  
13% of women reporting onset of OCD in the year after menarche.<sup>17</sup>

These reports suggest potential vulnerability in children and youth with NDDs during  
puberty that extends beyond emotional and behavioural changes typically experienced during  
this time.<sup>18</sup> Unfortunately, all work to date has focused within specific diagnoses, limiting our  
ability to understand shared vulnerability during puberty across NDDs. Importantly, this  
information can refine guidance provided to families of adolescents with NDDs. The objective of  
this study was to evaluate the relationship between stage of puberty and  
internalizing/externalizing behavior within and across various NDDs, accounting for sex  
differences.

## Methods:

### *Setting and Participants*

This was a cross-sectional study using data collected through the Ontario Brain  
Institute Province of Ontario Neurodevelopmental Disorders (OBI-POND) network. OBI-POND  
is a research collaboration across five Ontario centers (redacted names). OBI-POND enrolls  
children with NDDs, including ASD, ADHD, OCD, as well as typically developing (TD)

1  
2  
3 controls, at any time after their diagnosis until age 21 years, 11 months. All caregivers provided  
4 informed consent for enrollment in OBI-POND (participants who were capable provided  
5 informed consent for their participation). Participants for this analysis were enrolled between  
6  
7  
8 February 2012 and March 2019. Participants who completed both the Child Behavior Checklist  
9  
10 (CBCL) and the Tanner staging form at the time of enrollment were included.  
11  
12  
13

14  
15 Participants with a primary diagnosis of ASD, ADHD, and OCD were included in the  
16 analysis, along with TD controls. Diagnostic assessments were performed on all OBI-POND  
17 participants to confirm their reported clinical diagnosis. These included the Autism Diagnostic  
18 Observation Schedule<sup>19</sup> and the Autism Diagnostic Interview – Revised<sup>20</sup> for participants with  
19 ASD, The Schedule for Affective Disorders and Schizophrenia, Childhood Version (K-SADS)<sup>21</sup>  
20 and the Parent interview for Child Symptoms<sup>22</sup> for participants with ADHD, and the K-SADS  
21 and the Children’s Yale-Brown Obsessive Compulsive Scale for Children<sup>23</sup> for participants with  
22 OCD. Participants with sub-threshold diagnoses were excluded.  
23  
24  
25  
26  
27  
28  
29  
30  
31  
32

### 33 34 35 *Measures*

36  
37 As part of OBI-POND, all participants had caregivers complete the Child Behavior  
38 Checklist (CBCL).<sup>24</sup> The CBCL is a reliable and validated behavioral questionnaire that has been  
39 used in many observational studies.<sup>25</sup> CBCL T-scores for internalizing and externalizing  
40 behavior were used as the dependent variables in the analyses. These are norm-referenced for a  
41 general population sample in the same age-range and sex with an expected mean of 50 across all  
42 ages; as such, any effects of puberty would be above and beyond those expected based on age  
43 and sex.  
44  
45  
46  
47  
48  
49  
50  
51  
52  
53  
54  
55  
56  
57  
58  
59  
60

1  
2  
3 Participants aged eight years or older (or their caregivers when research  
4 staff/caregivers felt that participants were not able) completed a Tanner staging form (also called  
5 Sexual Maturity Rating; SMR), where penile/breast stages of growth (SOG) and pubic hair (PH)  
6 development are both reported compared to reference drawings on a scale of one (pre-pubertal)  
7 to five (post-pubertal).<sup>26</sup> Drawings used for self-assessment in a Hong-Kong sample showed  
8 substantial agreement for SOG and PH for females, with males having substantial agreement for  
9 PH and moderate agreement for SOG.<sup>27</sup> SOG and PH ratings were combined into one categorical  
10 variable representing pubertal status. Where SOG and PH scores differed by 1, the lower score  
11 was used. When scores differed by 2, the intermediate score was used. For participants who had  
12 only reported one of PH or SOG, that stage was used as their overall Tanner rating. Tanner  
13 ratings were then recorded as pre-pubertal (stage 1), early pubertal (stages 2-3), and late pubertal  
14 (stage 4-5).

15  
16  
17  
18  
19  
20  
21  
22  
23  
24  
25  
26  
27  
28  
29  
30  
31  
32  
33  
34  
35  
36  
37  
38  
39  
40  
41  
42  
43  
44  
45  
46  
47  
48  
49  
50  
51  
52  
53  
54  
55  
56  
57  
58  
59  
60  
Pubertal staging and the CBCL were completed by 1066 participants. To ensure these  
measures were contemporaneous, 17 participants with a gap of six months or longer between the  
two measures were excluded. Six participants reported a difference of more than two stages  
between PH and SOG and were excluded due to concerns about reliability of reporting.

Sex and primary neurodevelopmental diagnosis were included as additional  
covariables in the model. Information on gender was available for <10% of our sample (77  
participants) because it was not collected as part of OBI-POND until 2019. For this reason,  
gender was not included in the analysis.

### *Analysis*

1  
2  
3 Statistical analyses were completed using SAS 9.4 (2002-2012, SAS Institute Inc.,  
4 Cary, NC, USA). Descriptive statistics were used to characterize the sample. To determine if  
5  
6 differences in internalizing and externalizing behaviors across pubertal stage varied by sex and  
7  
8 diagnosis, we tested a 3-way interaction in an ANOVA model that allowed for heterogeneous  
9  
10 variance across sex, pubertal stage, and diagnosis. After removing the non-significant 3-way  
11  
12 interaction, we assessed whether behaviors across pubertal stage varied by diagnosis across  
13  
14 males and females simultaneously by testing the pubertal stage by diagnosis 2-way interaction.  
15  
16 After dropping both the non-significant pubertal stage by diagnosis 2-way interaction and the  
17  
18 non-significant sex by diagnosis 2-way interaction, we report the differences in behaviors across  
19  
20 pubertal stages for males and females separately, across all diagnoses.  
21  
22  
23  
24  
25  
26  
27

#### 28 *Ethics approval:*

29  
30 This project received research ethics approval from Holland Bloorview Kids Rehabilitation  
31  
32 Hospital, Toronto; The Hospital for Sick Children, Toronto; McMaster Children's Hospital,  
33  
34 Hamilton; Lawson Health Research Institute, London and Queen's University, Kingston.  
35  
36 Informed consent was provided by all capable participants and by caregivers for participants who  
37  
38 were not capable of providing consent.  
39  
40  
41  
42  
43

#### 44 *Patient and Public Involvement:*

45  
46 POND has a Participant Advisory Committee (families and stakeholders from NDD community  
47  
48 groups) and a Youth Advisory Committee comprised of youth with NDDs.  
49  
50  
51

#### 52 **Results:**

1  
2  
3 The analysis included 1043 participants. Demographic information for the sample is  
4 summarized in **Table 1**. For both males ( $X^2 = 33.1$ , degrees of freedom [df] 6,  $p < 0.001$ ) and  
5 females ( $X^2 = 22$ , df 6,  $p = 0.001$ ), there were significant differences in the distribution across  
6 pubertal stages, with more pre-pubertal representation in the ADHD group. The proportion of  
7 males and females by diagnostic category differed significantly ( $X^2 = 52.4$ , df 3,  $p < 0.001$ ), with  
8 ASD and ADHD showing an expected higher proportion of males. The informant (i.e., person  
9 completing the pubertal staging) also differed between the groups, with proportionately higher  
10 self-report in the TD group compared to the NDD groups ( $X^2 = 93$ , df 6,  $p < 0.001$ ).  
11  
12  
13  
14  
15  
16  
17  
18  
19  
20  
21  
22  
23

#### 24 *Internalizing behavior*

25  
26 Results for the final internalizing behavior model are presented in **Table 2** and **Figure 1**. Scores  
27 in the TD group were lower than the ASD, ADHD, and OCD groups. The three-way interaction  
28 between pubertal stage, sex, and diagnosis was not significant ( $F = 1.28$ , df 6,  $p = 0.26$ ; see  
29 Supplementary Table 1 for full model results). There was a significant interaction between sex  
30 and pubertal stage ( $F = 3.55$ , df 2,  $p = 0.03$ ). Across diagnoses, males showed no significant  
31 differences in levels of internalizing behaviors based on stage of puberty. Late pubertal females  
32 had CBCL scores that were higher by 4.4 points (95% confidence interval [CI] -1.4, 3.8;  
33  $p = 0.001$ ) compared to pre-pubertal females. This pattern significantly differed ( $p = 0.01$ ) from the  
34 pattern in males (difference between pre- and late puberty = 0.2; 95% CI -1.8, 2.0;  $p = 0.8$ ).  
35  
36  
37  
38  
39  
40  
41  
42  
43  
44  
45  
46  
47  
48

#### 49 *Externalizing behavior*

50  
51 Results for the final externalizing behavior model are presented in **Table 3** and **Figure 2**. Here  
52 again, scores for the TD group were lower than for the ASD, ADHD, and OCD groups. The  
53  
54  
55  
56  
57  
58  
59  
60



1  
2  
3 three-way interaction between pubertal stage, sex, and diagnosis was not significant ( $F = 0.59$ ,  $df$   
4 6,  $p = 0.74$ ; Supplementary Table 1). There was a significant interaction between sex and  
5  
6 pubertal stage ( $F = 6.57$ ,  $df 2$ ,  $p=0.002$ ). Early pubertal males showed lower levels of  
7  
8 externalizing behavior compared to pre-pubertal males (difference -2.2, 95% CI -4.0, -0.5;  
9  
10  $p=0.01$ ). By contrast, females showed a non-significant trend toward higher levels of  
11  
12 externalizing behavior in early puberty versus those in pre-puberty (difference 2.8, 95% CI 0,  
13  
14 5.7,  $p=0.051$ ). The difference in these patterns between males and females was significant  
15  
16 ( $p=0.003$ ). While both males and females showed lower levels of externalizing behaviors in late  
17  
18 puberty compared with early puberty, these differences are not statistically significant, although  
19  
20 clinically important effects cannot be ruled out (95%CI for males -3.6,0.3 and 95%CL for  
21  
22 females -4.0 to 1.4).  
23  
24  
25  
26  
27  
28  
29  
30

### 31 **Discussion:**

32  
33 This study examined the association between pubertal stage and behavioral profile  
34  
35 across various NDDs. Our analysis is strengthened by the presence of a TD control group. The  
36  
37 pattern of behaviors across pubertal stages was similar between the TD group and the NDD  
38  
39 groups. A key distinction, however, is that the CBCL scores for the TD groups were consistently  
40  
41 lower than for the NDD groups. Hence, although the pattern is similar, families might experience  
42  
43 puberty as affecting children with NDDs more than their TD peers.  
44  
45

46  
47 Across NDD and TD groups, levels of internalizing behaviors were the same for males  
48  
49 across the different pubertal stages, although the TD group had much lower scores. Across  
50  
51 diagnoses, females in late puberty showed higher levels of internalizing behavior compared to  
52  
53 their pre-pubertal counterparts, a pattern which differed significantly from their male peers. Our  
54  
55  
56  
57  
58  
59  
60

1  
2  
3 results echo findings in the general population that have shown increases in anxiety<sup>28</sup> and  
4 depression<sup>29</sup> over the adolescent years that are greater for females compared to males. In NDD  
5 populations, Gotham, Brunwasser and Lord<sup>30</sup> measured internalizing behaviors longitudinally in  
6 adolescent groups with ASD and with developmental delays and found that increases in  
7 internalizing behaviors with age were greater for females compared to males. Pubertal stage was  
8 not measured in their analysis. Overall, these findings endorse heightened surveillance for  
9 internalizing behaviors in females with pubertal onset.

19 Our data showed lower levels of externalizing behaviors in early pubertal males  
20 compared to pre-pubertal males. This difference in levels was significantly different from the  
21 pattern in females, which showed a trend (non-significant) toward increased externalizing  
22 behaviors. Patterns for externalizing behaviors during adolescence are mixed in the existing  
23 literature. One large Dutch cross-sectional study in a general population of youth found an  
24 increasing prevalence of externalizing behaviors with each successive Tanner stage in both males  
25 and females.<sup>31</sup> An older UK-based study of levels of aggression in a typically developing  
26 population of participants found that males started with higher levels of self-reported aggression,  
27 but by late puberty there were no differences between males and females.<sup>32</sup> Verbal aggression  
28 against adults increased over the adolescent years; however, this increase was more pronounced  
29 among girls. The literature is somewhat sparser when considering NDD groups. A Swiss study of  
30 adolescents with ADHD reported decreasing aggression across the adolescent years but did not  
31 separate males and females.<sup>33</sup> A longitudinal study of children/youth with ASD showed general  
32 patterns of decreasing hyperactivity, and to a lesser extent, irritability, across the adolescent  
33 years but again did not distinguish by sex. Our results suggest that, similar to internalizing  
34 behaviors, females might be at higher risk for externalizing behaviors during adolescence. More  
35  
36  
37  
38  
39  
40  
41  
42  
43  
44  
45  
46  
47  
48  
49  
50  
51  
52  
53  
54  
55  
56  
57  
58  
59  
60

1  
2  
3 work is needed to determine the nature of these behaviors in NDD groups, such as increased  
4  
5 verbal aggression as suggested by studies of adolescents in the general population.  
6

7  
8         There are important limitations to our analysis. The data were cross-sectional and did  
9  
10 not capture individual behavioral trajectories throughout puberty. We were unable to distinguish  
11  
12 between puberty-related effects and age-related effects; to mitigate this limitation, we used  
13  
14 CBCL T-scores in order to capture pubertal effects beyond those expected based on age. This  
15  
16 analysis did not include whether puberty occurred early or late, both of which have been linked  
17  
18 to depressive symptoms in late adolescence.<sup>34</sup> Longitudinal studies measuring pubertal stage and  
19  
20 behavior are needed to optimally disentangle the effects of age and puberty, and should include  
21  
22 factors such as IQ and communication skills. Caregivers provided the majority of pubertal  
23  
24 staging, which may not be reliable, particularly for children/youth with lower support needs.  
25  
26 Both self-report and caregiver-report of Tanner stage have been shown to have good reliability in  
27  
28 typically developing females,<sup>35</sup> though self-report in males is less accurate,<sup>36</sup> particularly for  
29  
30 SOG.<sup>27</sup> Reports of Tanner staging were chosen over clinician examination to minimize the  
31  
32 intrusiveness of participation, allowing for a larger sample size, similar to other studies.<sup>31</sup> We did  
33  
34 not have access to information about gender for the vast majority of our sample. Future attention  
35  
36 should be paid to the ways in which gender, particularly non-cisgender, interacts with puberty in  
37  
38 NDDs. Finally, Tanner staging is a proxy for the internal hormonal states that are thought to  
39  
40 influence behavior;<sup>37,38</sup> fluctuations in hormonal states are not perfectly represented by external  
41  
42 appearance.  
43  
44  
45  
46  
47  
48

49         In conclusion, our analysis failed to find unique patterns of internalizing and  
50  
51 externalizing behavior in children/youth with NDDs compared to TD peers. Children with NDDs  
52  
53 had higher levels of behaviors compared to TD peers, which might accentuate caregiver  
54  
55  
56  
57  
58  
59  
60

1  
2  
3 perceptions of behavior changes during the pubertal period. Important sex differences emerged,  
4  
5 with females showing significantly higher levels of internalizing behavior at later pubertal  
6  
7 stages. Puberty represents an important milestone for adolescents both with and without NDDs,  
8  
9 and as such an important opportunity for anticipatory guidance. Our results suggest that females,  
10  
11 particularly those with NDDs, should be monitored for affective disorders. Further study is  
12  
13 needed on the associations between puberty, sex, and externalizing behaviors in NDD  
14  
15 populations. In the future, longitudinal cohort designs will allow for optimal study of the effects  
16  
17 of puberty and behaviors in NDD populations.  
18  
19  
20  
21  
22  
23  
24  
25  
26  
27  
28  
29  
30  
31  
32  
33  
34  
35  
36  
37  
38  
39  
40  
41  
42  
43  
44  
45  
46  
47  
48  
49  
50  
51  
52  
53  
54  
55  
56  
57  
58  
59  
60

**References:**

1. Autism Treatment Network. Puberty and Adolescence Resource: a Guide for Parents of Adolescents with Autism Spectrum Disorder. Autism Speaks. December 12, 2016.  
[https://www.autismspeaks.org/sites/default/files/documents/atn/puberty\\_tool\\_kit.pdf](https://www.autismspeaks.org/sites/default/files/documents/atn/puberty_tool_kit.pdf)
2. Theobald M. When ADHD Meets Puberty: One Mom's Story. *Everyday Health* blog. December 12, 2013. <http://www.everydayhealth.com/adhd/when-adhd-meets-puberty-one-moms-story.aspx>
3. Patton GC, Viner R. Pubertal transitions in health. *Lancet*. 2007;369(9567):1130-1139.
4. Gur RE, Gur, R.C. Sex differences in brain and behavior in adolescence: Findings from the Philadelphia Neurodevelopmental Cohort. *Neuroscience and Biobehavioral Reviews*. 2016;70(2016):159-70.
5. Steinberg L. Cognitive and affective development in adolescence. *Trends in cognitive sciences*. 2005;9(2):69-74.
6. Spear LP. The adolescent brain and age-related behavioral manifestations. *Neuroscience & biobehavioral reviews*. 2000;24(4):417-463.
7. Gillberg C, Steffenburg S. Outcome and prognostic factors in infantile autism and similar conditions: a population-based study of 46 cases followed through puberty. *Journal of Autism & Developmental Disorders*. 1987;17(2):273-287.
8. Lai MC, Lerch JP, Floris DL, et al. Imaging sex/gender and autism in the brain: Etiological implications. *Journal of Neuroscience Research*. 2017;95(1):380-397.
9. Loke H, Harley V, Lee J. Biological factors underlying sex differences in neurological disorders. *The International Journal of Biochemistry and Cell Biology*. 2015;65:139-50.

- 1  
2  
3 10. Mathes BM, Morabito DM, Schmidt NB. Epidemiological and clinical gender differences  
4  
5 in OCD. *Current Psychiatry Reports*. 2019;21(5):1-7.  
6
- 7  
8 11. Kosidou K, Dalman C, Widman L, et al. Maternal polycystic ovary syndrome and the  
9  
10 risk of autism spectrum disorders in the offspring: a population-based nationwide study in  
11  
12 Sweden. *Molecular Psychiatry*. 2016;21(10):1441-8.  
13
- 14  
15 12. Kosidou K, Dalman C, Widman L, et al. Maternal polycystic ovary syndrome and the  
16  
17 risk for attention-deficit/hyperactivity disorder in the offspring. *Biological Psychiatry*.  
18  
19 2016;Epub ahead of print  
20
- 21  
22 13. Baribeau DA, Doyle-Thomas KA, Dupuis A, et al. Examining and comparing social  
23  
24 perception abilities across childhood-onset neurodevelopmental disorders. *Journal of the*  
25  
26 *American Academy of Child & Adolescent Psychiatry*. 2015;54(6):479-86.  
27
- 28  
29 14. Gillberg C. Autistic children growing up: problems during puberty and adolescence.  
30  
31 *Developmental Medicine & Child Neurology*. 1984;26(1):125-129.  
32
- 33  
34 15. Gillberg C, Schaumann H. Infantile autism and puberty. *Journal of Autism &*  
35  
36 *Developmental Disorders*. 1981;11(4):365-371.  
37
- 38  
39 16. Ostojic D, Miller, C.J. Association between pubertal onset and symptoms of ADHD in  
40  
41 female university students. *Journal of Attention Disorders*. 2014;  
42
- 43  
44 17. Guglielmi V, Vulink, N.C., Denys, D., Wang, Y., Samuels, J.F., Nestadt, G. Obsessive-  
45  
46 compulsive disorder and female reproductive cycle events: results from the OCD and  
47  
48 reproduction collaborative study. *Depression and Anxiety*. 2014;31(12):979-87.  
49
- 50  
51 18. Rutter M, Graham, P, Chadwick, OFD, Yule, W. Adolescent turmoil: fact or fiction?  
52  
53 *Journal of Child Psychology and Psychiatry*. 1976;17(1):35-56.  
54  
55  
56  
57  
58  
59  
60

- 1  
2  
3 19. Lord C, Rutter M, Dilavore P, Risi S, Gotham K, Bishop S. *Autism Diagnostic*  
4  
5 *Observation Schedule, Second Edition*. WPS; 2012.  
6  
7  
8 20. Rutter M, Lecouteur A, Lord C. *Autism Diagnostic Interview - Revised (ADI-R)*. WPS;  
9  
10 2003.  
11  
12 21. Ambrosini PJ. Historical development and present status of the Schedule for Affective  
13  
14 Disorders and Schizophrenia for School-Age Children (K-SADS). *Journal of the American*  
15  
16 *Academy of Child & Adolescent Psychiatry*. 2000;39(1):49-58.  
17  
18  
19 22. Ickowicz A, Schachar RJ, Sugarman R, Chen SX, Millette C, Cook L. The parent  
20  
21 interview for child symptoms: a situation-specific clinical research interview for attention-deficit  
22  
23 hyperactivity and related disorders. *The Canadian Journal of Psychiatry*. 2006;51(5):325-328.  
24  
25  
26 23. Scahill L, Riddle MA, McSwiggin-Hardin M, et al. Children's Yale-Brown Obsessive  
27  
28 Compulsive Scale: reliability and validity. *J Am Acad Child Adolesc Psychiatry*. 1997;36(6):844-  
29  
30 52.  
31  
32  
33 24. Achenbach TM, Rescorla LA. *Manual for the ASEBA school-age forms and profiles*.  
34  
35 University of Vermont Research Centre for Children, Youth & Families; 2001.  
36  
37  
38 25. NICHD Early Child Care Research Network. Child care and child development: Results  
39  
40 from the NICHD study of early child care and youth development. U. S. Department of Health  
41  
42 and Human Services,. Accessed October 22, 2018.  
43  
44 [https://www.nichd.nih.gov/sites/default/files/publications/pubs/documents/seccyd\\_06.pdf](https://www.nichd.nih.gov/sites/default/files/publications/pubs/documents/seccyd_06.pdf)  
45  
46  
47 26. Morris NM & Udry JR. Validation of a self-administered instrument to assess stage of  
48  
49 adolescent development. *Journal of Youth & Adolescence*. 1980;9(3):271-280.  
50  
51  
52  
53  
54  
55  
56  
57  
58  
59  
60

- 1  
2  
3 27. Chan NPT, Sung RYT, Kong APS, Goggins WB, So HK, Nelson EAS. Reliability of  
4 pubertal self-assessment in Hong Kong Chinese children. *Journal of Paediatrics and Child*  
5 *Health*. 2008;44:353-8.  
6  
7  
8  
9  
10 28. Essau CA, Conradt J, Petermann F. Frequency, comorbidity, and psychosocial  
11 impairment of anxiety disorders in German adolescents. *Journal of Anxiety Disorders*.  
12 2000;14(3):263-279.  
13  
14  
15  
16  
17 29. Hankin BL, Abramson LY, Moffitt TE, Silva PA, McGee R, Angell KE. Development of  
18 depression from preadolescence to young adulthood: emerging gender differences in a 10-year  
19 longitudinal study. *Journal of Abnormal Psychology*. 1998;107(1):128.  
20  
21  
22  
23  
24 30. Gotham K, Brunwasser SM, Lord C. Depressive and anxiety symptom trajectories from  
25 school age through young adulthood in samples with autism spectrum disorder and  
26 developmental delay. *Journal of the American Academy of Child & Adolescent Psychiatry*.  
27 2015;54(5):369-376.e3. doi:10.1016/j.jaac.2015.02.005  
28  
29  
30  
31  
32  
33 31. Oldehinkel AJ, Verhulst FC, Ormel J. Mental health problems during puberty: Tanner  
34 stage-related differences in specific symptoms. The TRAILS study. *Journal of adolescence*.  
35 2011;34(1):73-85.  
36  
37  
38  
39  
40 32. Finkelstein JW, Von Eye A, Preece MA. The relationship between aggressive behavior  
41 and puberty in normal adolescents: A longitudinal study. *Journal of Adolescent Health*.  
42 1994;15(4):319-326.  
43  
44  
45  
46  
47 33. Murray AL, Obsuth I, Zirk-Sadowski J, Ribeaud D, Eisner M. Developmental relations  
48 between ADHD symptoms and reactive versus proactive aggression across childhood and  
49 adolescence. *Journal of attention disorders*. 2020;24(12):1701-1710.  
50  
51  
52  
53  
54  
55  
56  
57  
58  
59  
60



- 1  
2  
3 34. Benoit A, Lacourse E, Claes M. Pubertal timing and depressive symptoms in late  
4 adolescence: The moderating role of individual, peer, and parental factors. *Development and*  
5  
6 *Psychopathology*. 2013;25(2):455-471.  
7  
8  
9  
10 35. Brooks-Gunn J, Warren MP, Rosso J, Gargiulo J. Validity of self-report measures of  
11 girls' pubertal status. *Child development*. 1987;58(3):829-841.  
12  
13  
14 36. Neinstein LS. Adolescent self-assessment of sexual maturation: reassessment and  
15 evaluation in a mixed ethnic urban population. *Clinical pediatrics*. 1982;21(8):482-484.  
16  
17  
18 37. Brooks-Gunn J, Warren MP. Biological and social contributions to negative affect in  
19 young adolescent girls. *Child development*. 1989;60(1):40-55.  
20  
21  
22  
23 38. Olweus D, Mattsson A, Schalling D, Low H. Testosterone, aggression, physical, and  
24 personality dimensions in normal adolescent males. *Psychosomatic medicine*. 1980;42(2):253-  
25  
26  
27  
28 269.  
29  
30  
31  
32  
33  
34  
35  
36  
37  
38  
39  
40  
41  
42  
43  
44  
45  
46  
47  
48  
49  
50  
51  
52  
53  
54  
55  
56  
57  
58  
59  
60

**Table 1: Sample Characteristics**

|                                     | Typically Developing |            | ASD         |             | ADHD        |             | OCD         |             |
|-------------------------------------|----------------------|------------|-------------|-------------|-------------|-------------|-------------|-------------|
|                                     | Male                 | Female     | Male        | Female      | Male        | Female      | Male        | Female      |
| n                                   | 78                   | 53         | 351         | 100         | 226         | 79          | 78          | 78          |
| Race/ethnicity n (% of non-missing) |                      |            |             |             |             |             |             |             |
| Arab                                | 1 (1)                | 0          | 2 (1)       | 1 (1)       | 4 (3)       | 1 (2)       | 2 (4)       | 0           |
| Black                               | 3 (4)                | 1 (2)      | 16 (7)      | 1 (1)       | 4 (3)       | 6 (10)      | 0           | 2 (5)       |
| Chinese                             | 7 (9)                | 4 (8)      | 7 (3)       | 4 (6)       | 6 (4)       | 2 (3)       | 1 (2)       | 1 (3)       |
| East Asian                          | 1 (1)                | 0          | 1 (<1)      | 0           | 0           | 0           | 2 (4)       | 0           |
| Indigenous                          | 1 (1)                | 0          | 14 (6)      | 4 (6)       | 5 (3)       | 5 (8)       | 1 (2)       | 0           |
| Japanese                            | 2 (3)                | 1 (2)      | 1 (<1)      | 0           | 0           | 0           | 0           | 0           |
| Jewish                              | 1 (1)                | 1 (2)      | 10 (4)      | 3 (4)       | 19 (13)     | 8 (13)      | 1 (2)       | 1 (3)       |
| Korean                              | 0                    | 1 (2)      | 0           | 1 (1)       | 0           | 0           | 2 (4)       | 0           |
| American/Hispanic                   | 5 (6)                | 0          | 11 (5)      | 0           | 7 (5)       | 1 (2)       | 0           | 2 (5)       |
| South Asian                         | 4 (5)                | 3 (6)      | 5 (2)       | 2 (3)       | 4 (3)       | 2 (3)       | 5 (11)      | 0           |
| Southeast Asian                     | 0                    | 1 (2)      | 2 (1)       | 2 (3)       | 0           | 1 (2)       | 0           | 0           |
| West Asian                          | 0                    | 0          | 2 (1)       | 0           | 4 (3)       | 1 (2)       | 3 (6)       | 0           |
| White                               | 60 (77)              | 47 (89)    | 195 (83)    | 57 (83)     | 116 (78)    | 51 (84)     | 42 (89)     | 34 (89)     |
| Missing Ethnicity                   | 0                    | 0          | 115 (33)    | 31 (31)     | 77 (34)     | 18 (23)     | 31 (40)     | 40 (51)     |
| Informant, n (%)                    |                      |            |             |             |             |             |             |             |
| Missing                             | 4 (5)                | 3 (6)      | 16 (5)      | 7 (7)       | 15 (7)      | 3 (4)       | 4 (5)       | 2 (3)       |
| Parent                              | 25 (32)              | 21 (40)    | 269 (77)    | 70 (70)     | 165 (73)    | 59 (75)     | 56 (72)     | 53 (68)     |
| Self                                | 49 (63)              | 29 (55)    | 66 (19)     | 23 (23)     | 46 (20)     | 17 (22)     | 18 (23)     | 23 (29)     |
|                                     | Mean (sd)            |            |             |             |             |             |             |             |
| Age                                 | 12.4 (2.7)           | 12.9 (3.2) | 12.4 (2.9)  | 12.6 (3.0)  | 11.0 (2.5)  | 10.8 (2.4)  | 12.6 (2.6)  | 13.5 (2.5)  |
| Pre puberty                         | 9.7 (1.3)            | 9.7 (1.2)  | 10.1 (1.4)  | 9.8 (1.2)   | 9.9 (1.5)   | 9.4 (0.9)   | 10.5 (1.5)  | 10.4 (1.5)  |
| Early Puberty                       | 12.7 (1.6)           | 12.7 (1.3) | 12.6 (2.0)  | 11.5 (1.9)  | 12.3 (1.7)  | 11.3 (1.1)  | 12.9 (2.0)  | 13.0 (2.0)  |
| Late Puberty                        | 15.3 (1.8)           | 16.1 (2.4) | 15.8 (1.8)  | 15.1 (2.5)  | 15.6 (1.6)  | 14.5 (2.6)  | 15.7 (1.3)  | 15.3 (1.3)  |
| CBCL Externalizing                  | 42.7 (8.9)           | 42.5 (7.8) | 56.5 (10.6) | 57.1 (8.9)  | 61.0 (10.7) | 61.0 (10.6) | 49.6 (10.9) | 53.5 (10.7) |
| Pre puberty                         | 45.2 (9.7)           | 39.7 (7.3) | 58.8 (10.9) | 56.6 (10.2) | 61.6 (10.7) | 59.4 (10.1) | 51.5 (13.3) | 54.3 (5.8)  |
| Early Puberty                       | 41.9 (9.4)           | 43.9 (8.7) | 55.7 (9.9)  | 56.9 (9.6)  | 61.7 (10.0) | 63.5 (10.8) | 48.1 (10.0) | 55.4 (11.0) |
| Late Puberty                        | 41.0 (6.7)           | 43.9 (7.4) | 54.6 (10.3) | 57.6 (7.8)  | 56.4 (12.0) | 59.8 (11.0) | 49.2 (8.6)  | 52.0 (11.9) |
| CBCL Internalizing                  | 47.2 (9.0)           | 47.3 (9.3) | 62.5 (9.4)  | 62.6 (9.6)  | 61.0 (10.3) | 60.3 (11.4) | 63.5 (10.9) | 63.7 (10.0) |
| Pre puberty                         | 48.5 (9.0)           | 44.7 (8.2) | 62.6 (9.7)  | 57.9 (10.5) | 60.4 (10.6) | 58.1 (10.4) | 63.5 (10.4) | 64.1 (7.5)  |

|               |            |                |            |            |             |             |             |             |
|---------------|------------|----------------|------------|------------|-------------|-------------|-------------|-------------|
| Early Puberty | 47.8 (9.7) | 45.2 (8.9)     | 62.0 (9.3) | 62.3 (7.3) | 61.6 (10.0) | 62.2 (12.1) | 64.0 (8.9)  | 64.4 (8.0)  |
| Late Puberty  | 45.1 (7.9) | 51.2<br>(10.5) | 63.0 (9.3) | 65.3 (9.5) | 62.5 (9.4)  | 59.8 (11.4) | 62.8 (10.9) | 63.0 (12.1) |

Child-level ethnicity data were not collected from study inception, leading to a high level of missing data. More than one ethnicity could be reported, meaning percentages will not sum to 100%. Pre-puberty: Tanner stage 1; Early puberty: Tanner stages 2-3; Late puberty: Tanner stages 4-5. CBCL scores represent T-scores. ADHD: attention-deficit/hyperactivity disorder; ASD: autism spectrum disorder; CBCL: Child Behavior Checklist; OCD: obsessive compulsive disorder; sd: standard deviation

Confidential: For Review Only

**Table 2: Multivariable linear regression<sup>1</sup> CBCL internalizing behavior predicted scores and score differences**

|                          | Pre-puberty       | Puberty stages    |                   | Puberty stage differences |                  |                   |
|--------------------------|-------------------|-------------------|-------------------|---------------------------|------------------|-------------------|
|                          |                   | Early Puberty     | Late puberty      | Pre to Early              | Early to Late    | Pre to Late       |
| <b>Males</b>             |                   |                   |                   |                           |                  |                   |
| TD                       | 47.2 (45.3, 49.1) | 47.4 (45.4, 49.3) | 47.4 (45.4, 49.5) |                           |                  |                   |
| ASD                      | 62.4 (61.1, 63.7) | 62.5 (61.1, 63.9) | 62.6 (61.1, 64.1) | 0.1 (-1.5, 1.8)           | 0.1 (-1.8, 2.0)  | 0.2 (-1.6, 2.0)   |
| ADHD                     | 61.0 (59.5, 62.4) | 61.1 (59.5, 62.7) | 61.2 (59.3, 63.0) |                           |                  |                   |
| OCD                      | 63.3 (61.3, 65.2) | 63.4 (61.4, 65.4) | 63.5 (61.4, 65.6) |                           |                  |                   |
| <b>Females</b>           |                   |                   |                   |                           |                  |                   |
| TD                       | 44.5 (42.1, 46.9) | 47.7 (45.3, 50.1) | 48.9 (46.7, 51.2) |                           |                  |                   |
| ASD                      | 59.7 (57.5, 61.9) | 62.9 (60.8, 65.0) | 64.1 (62.2, 66.0) | 3.2 (0.4, 6.0)            | 1.2 (-1.4, 3.8)  | 4.4 (1.7, 7.1)    |
| ADHD                     | 58.2 (56.0, 60.5) | 61.5 (59.2, 63.7) | 62.7 (60.5, 64.8) | <i>p</i> = .025           |                  | <i>p</i> = .001   |
| OCD                      | 60.6 (58.1, 63.1) | 63.8 (61.4, 66.1) | 65.0 (62.9, 67.1) |                           |                  |                   |
| <b>Males vs. Females</b> |                   |                   |                   |                           |                  |                   |
|                          |                   |                   |                   | -3.1 (-6.3, 0.2)          | -1.1 (-4.4, 2.1) | -4.2 (-7.4, -1.0) |
|                          |                   |                   |                   |                           |                  | <i>p</i> = .010   |

<sup>1</sup> Pubertal stage ( $F(2,1034) = 4.1, p = .02$ ); Sex ( $F(1,1034) = 0.2, p = 0.7$ ); Diagnosis ( $F(3,1034) = 100.7, p < .0001$ ); Sex x Pubertal stage ( $F(2,1034) = 3.6, p = .03$ )

Pre-puberty: Tanner stage 1; Early puberty: Tanner stages 2-3; Late puberty: Tanner stages 4-5. ADHD: attention-deficit/hyperactivity disorder; ASD: autism spectrum disorder; CBCL: Child Behavior Checklist; OCD: obsessive compulsive disorder; TD: typically developing

**Table 3: Multivariable linear regression<sup>1</sup> CBCL externalizing behavior predicted scores and score differences**

|                          |      | Puberty stages    |                   |                   | Puberty stage differences |                  |                   |
|--------------------------|------|-------------------|-------------------|-------------------|---------------------------|------------------|-------------------|
|                          |      | Pre-puberty       | Early Puberty     | Late puberty      | Pre to Early              | Early to Late    | Pre to Late       |
| <b>Males</b>             |      |                   |                   |                   |                           |                  |                   |
|                          | TD   | 44.2 (42.4, 46.0) | 42.0 (40.1, 43.8) | 40.3 (38.3, 42.3) |                           |                  |                   |
|                          | ASD  | 58.3 (57.0, 59.7) | 56.1 (54.6, 57.5) | 54.4 (52.9, 56.0) | -2.2 (-4.0, -0.5)         | -1.7 (-3.6, 0.3) | -3.9 (-5.8, -2.0) |
|                          | ADHD | 62.2 (60.7, 63.6) | 59.9 (58.3, 61.6) | 58.3 (56.4, 60.2) | <i>p</i> = .010           |                  | <i>p</i> < .0001  |
|                          | OCD  | 52.9 (50.8, 55.0) | 50.7 (48.6, 52.8) | 49.0 (46.8, 51.2) |                           |                  |                   |
| <b>Females</b>           |      |                   |                   |                   |                           |                  |                   |
|                          | TD   | 41.8 (39.5, 44.1) | 44.6 (42.3, 47.0) | 43.3 (41.2, 45.5) |                           |                  |                   |
|                          | ASD  | 55.9 (53.7, 58.2) | 58.8 (56.6, 61.0) | 57.5 (55.5, 59.4) | 2.8 (0.0, 5.7)            | -1.3 (-4.0, 1.4) | 1.5 (-1.2, 4.3)   |
|                          | ADHD | 59.8 (57.5, 62.0) | 62.6 (60.3, 64.9) | 61.3 (59.1, 63.5) |                           |                  |                   |
|                          | OCD  | 50.5 (47.9, 53.1) | 53.3 (50.9, 55.8) | 52.0 (49.8, 54.3) |                           |                  |                   |
| <b>Males vs. Females</b> |      |                   |                   |                   |                           |                  |                   |
|                          |      |                   |                   |                   | -5.1 (-8.4, -1.8)         | -0.4 (-3.7, 2.9) | -5.4 (-8.7, -2.2) |
|                          |      |                   |                   |                   | <i>p</i> = .003           |                  | <i>p</i> = .001   |

<sup>1</sup> Pubertal stage ( $F(2,1034) = 1.7, p = .2$ ); Sex ( $F(1,1034) = 2.44, p = 0.1$ ); Diagnosis ( $F(3,1034) = 129, p < .0001$ ); Sex x Pubertal stage ( $F(2,1034) = 6.6, p = .002$ )

Pre-puberty: Tanner stage 1; Early puberty: Tanner stages 2-3; Late puberty: Tanner stages 4-5. ADHD: attention-deficit/hyperactivity disorder; ASD: autism spectrum disorder; CBCL: Child Behavior Checklist; OCD: obsessive compulsive disorder; TD: typically developing

1  
2  
3  
4  
5  
6  
7  
8  
9  
10  
11  
12  
13  
14  
15  
16  
17  
18  
19  
20  
21  
22  
23  
24  
25  
26  
27  
28  
29  
30  
31  
32  
33  
34  
35  
36  
37  
38  
39  
40  
41  
42  
43  
44  
45  
46  
47

**Figure Legends:**

**Figure 1: CBCL Internalizing scores by pubertal stage, sex, and diagnosis.** ADHD: attention-deficit/hyperactivity disorder; ASD: autism spectrum disorder; OCD: obsessive compulsive disorder; TD: typical development.

**Figure 2: CBCL Externalizing scores by pubertal stage, sex, and diagnosis.** ADHD: attention-deficit/hyperactivity disorder; ASD: autism spectrum disorder; OCD: obsessive compulsive disorder; TD: typical development.

Confidential: For Review Only

1  
2  
3  
4  
5  
6  
7  
8  
9  
10  
11  
12  
13  
14  
15  
16  
17  
18  
19  
20  
21  
22  
23  
24  
25  
26  
27  
28  
29  
30  
31  
32  
33  
34  
35  
36  
37  
38  
39  
40  
41  
42  
43  
44  
45  
46  
47  
48  
49  
50  
51  
52  
53  
54  
55  
56  
57  
58  
59  
60

Figure 1

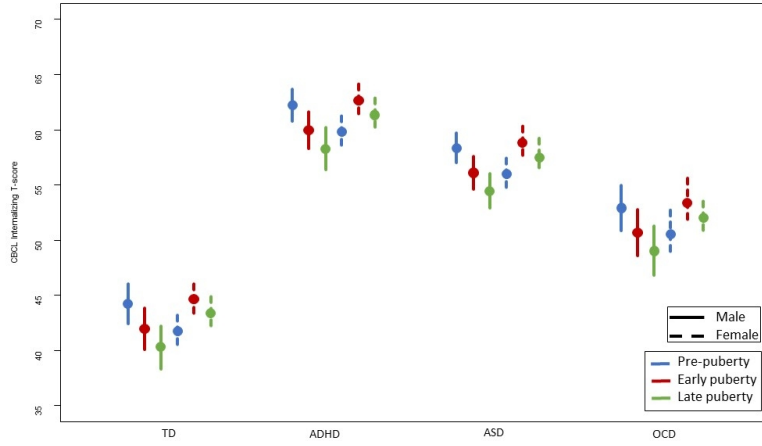

338x190mm (96 x 96 DPI)

1  
2  
3  
4  
5  
6  
7  
8  
9  
10  
11  
12  
13  
14  
15  
16  
17  
18  
19  
20  
21  
22  
23  
24  
25  
26  
27  
28  
29  
30  
31  
32  
33  
34  
35  
36  
37  
38  
39  
40  
41  
42  
43  
44  
45  
46  
47  
48  
49  
50  
51  
52  
53  
54  
55  
56  
57  
58  
59  
60

Figure 2

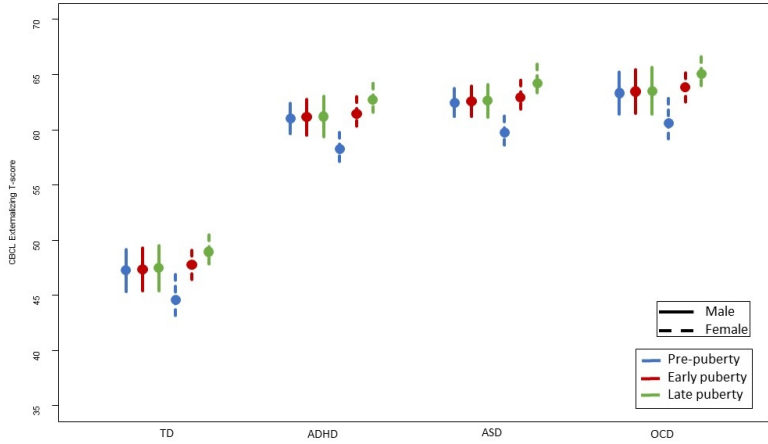

338x190mm (96 x 96 DPI)



**Supplementary Table 1: CBCL score differences by pubertal stage, diagnosis, and sex**

| <b>Internalizing behavior score difference: pre-puberty vs early puberty</b>  |                    |                   |                   |                  |
|-------------------------------------------------------------------------------|--------------------|-------------------|-------------------|------------------|
|                                                                               | <b>ADHD</b>        | <b>ASD</b>        | <b>OCD</b>        | <b>TD</b>        |
| Males                                                                         | 5.1 (-0.4, 10.7)   | 4.4 (-0.5, 9.3)   | 0.3 (-4.7, 5.3)   | 0.5 (-5.4, 6.4)  |
| Difference from TD                                                            | 4.6 (-3.5, 12.7)   | 3.9 (-3.8, 11.6)  | -0.2 (-7.9, 7.5)  |                  |
| Females                                                                       | 1.2 (-1.8, 4.2)    | -0.6 (-3.0, 1.8)  | 0.5 (-4.5, 5.6)   | -0.7 (-5.6, 4.3) |
| Difference from TD                                                            | 1.9 (-3.9, 7.7)    | 0.1 (-5.4, 5.6)   | 1.2 (-5.9, 8.3)   |                  |
| <b>Internalizing behavior score difference: early puberty vs late puberty</b> |                    |                   |                   |                  |
|                                                                               | <b>ADHD</b>        | <b>ASD</b>        | <b>OCD</b>        | <b>TD</b>        |
| Males                                                                         | -3.4 (-10.6, 3.8)  | 3.0 (-0.9, 6.8)   | -1.5 (-6.4, 3.5)  | 6.0 (-0.5, 12.4) |
| Difference from TD                                                            | -9.4 (-19.0, 0.3)  | -3.0 (-10.5, 4.5) | -7.4 (-15.5, 0.7) |                  |
| Females                                                                       | 0.9 (-3.3, 5.0)    | 1.0 (-1.5, 3.5)   | -1.2 (-6.8, 4.4)  | -2.7 (-7.4, 2.1) |
| Difference from TD                                                            | 3.6 (-2.8, 9.9)    | 3.6 (-1.8, 9.0)   | 1.5 (-5.9, 8.9)   |                  |
| <b>Externalizing behavior score difference: pre-puberty vs early puberty</b>  |                    |                   |                   |                  |
|                                                                               | <b>ADHD</b>        | <b>ASD</b>        | <b>OCD</b>        | <b>TD</b>        |
| Males                                                                         | 4.1 (-1.1, 9.2)    | 0.4 (-5.0, 5.7)   | 1.0 (-4.2, 6.3)   | 4.1 (-1.4, 9.7)  |
| Difference from TD                                                            | -0.1 (-7.6, 7.5)   | -3.8 (-11.5, 3.9) | -3.1 (-10.7, 4.5) |                  |
| Females                                                                       | 0.1 (-2.9, 3.1)    | -3.1 (-5.7, -0.5) | -3.5 (-9.6, 2.7)  | -3.3 (-8.3, 1.8) |
| Difference from TD                                                            | 3.3 (-2.6, 9.2)    | 0.2 (-5.5, 5.9)   | -0.2 (-8.2, 7.8)  |                  |
| <b>Externalizing behavior score difference: early puberty vs late puberty</b> |                    |                   |                   |                  |
|                                                                               | <b>ADHD</b>        | <b>ASD</b>        | <b>OCD</b>        | <b>TD</b>        |
| Males                                                                         | -3.7 (-10.5, 3.1)  | 0.6 (-3.6, 4.8)   | -3.4 (-9.1, 2.4)  | 0.0 (-5.4, 5.5)  |
| Difference from TD                                                            | -3.7 (-12.4, 5.0)  | 0.6 (-6.3, 7.5)   | -3.4 (-11.3, 4.5) |                  |
| Females                                                                       | -5.3 (-10.2, -0.3) | -1.0 (-3.7, 1.7)  | 1.1 (-4.0, 6.3)   | -0.9 (-5.3, 3.5) |
| Difference from TD                                                            | -4.4 (-11.0, 2.3)  | -0.1 (-5.3, 5.0)  | 2.0 (-4.8, 8.8)   |                  |

ADHD: attention-deficit hyperactivity disorder; ASD: autism spectrum disorder; CBCL: Child Behavior Checklist; OCD: obsessive compulsive disorder; TD: typically developing.

# BMJ Paediatrics Open

## Puberty, sex, and behavior in neurodevelopmental disorders versus typical development

|                               |                                                                                                                                                                                                                                                                                                                                                                                                                                                                                                                                                                                                                                                                                                                         |
|-------------------------------|-------------------------------------------------------------------------------------------------------------------------------------------------------------------------------------------------------------------------------------------------------------------------------------------------------------------------------------------------------------------------------------------------------------------------------------------------------------------------------------------------------------------------------------------------------------------------------------------------------------------------------------------------------------------------------------------------------------------------|
| Journal:                      | <i>BMJ Paediatrics Open</i>                                                                                                                                                                                                                                                                                                                                                                                                                                                                                                                                                                                                                                                                                             |
| Manuscript ID                 | bmjpo-2022-001469                                                                                                                                                                                                                                                                                                                                                                                                                                                                                                                                                                                                                                                                                                       |
| Article Type:                 | Original research                                                                                                                                                                                                                                                                                                                                                                                                                                                                                                                                                                                                                                                                                                       |
| Date Submitted by the Author: | 08-Mar-2022                                                                                                                                                                                                                                                                                                                                                                                                                                                                                                                                                                                                                                                                                                             |
| Complete List of Authors:     | Penner, Melanie; Holland Bloorview Kids Rehabilitation Hospital, ; University of Toronto Faculty of Medicine, Paediatrics<br>Dupuis, Annie; University of Toronto Dalla Lana School of Public Health<br>Arnold, Paul; Hotchkiss Brain Institute<br>Ayub, Muhammad; Queen's University, Psychiatry<br>Crosbie, Jennifer; The Hospital for Sick Children, Psychiatry<br>Georgiades, Stelios; McMaster University, Department of Psychiatry and Behavioural Neurosciences<br>Kelley, Elizabeth; Queen's University, Psychology<br>Nicolson, Robert; Western University, Psychiatry<br>Schachar, Russell; The Hospital for Sick Children, Psychiatry<br>Anagnostou, Evdokia; Holland Bloorview Kids Rehabilitation Hospital |
| Keywords:                     | Adolescent Health, Child Psychiatry                                                                                                                                                                                                                                                                                                                                                                                                                                                                                                                                                                                                                                                                                     |
|                               |                                                                                                                                                                                                                                                                                                                                                                                                                                                                                                                                                                                                                                                                                                                         |

SCHOLARONE™  
Manuscripts



I, the Submitting Author has the right to grant and does grant on behalf of all authors of the Work (as defined in the below author licence), an exclusive licence and/or a non-exclusive licence for contributions from authors who are: i) UK Crown employees; ii) where BMJ has agreed a CC-BY licence shall apply, and/or iii) in accordance with the terms applicable for US Federal Government officers or employees acting as part of their official duties; on a worldwide, perpetual, irrevocable, royalty-free basis to BMJ Publishing Group Ltd ("BMJ") its licensees and where the relevant Journal is co-owned by BMJ to the co-owners of the Journal, to publish the Work in this journal and any other BMJ products and to exploit all rights, as set out in our [licence](#).

The Submitting Author accepts and understands that any supply made under these terms is made by BMJ to the Submitting Author unless you are acting as an employee on behalf of your employer or a postgraduate student of an affiliated institution which is paying any applicable article publishing charge ("APC") for Open Access articles. Where the Submitting Author wishes to make the Work available on an Open Access basis (and intends to pay the relevant APC), the terms of reuse of such Open Access shall be governed by a Creative Commons licence – details of these licences and which [Creative Commons](#) licence will apply to this Work are set out in our licence referred to above.

Other than as permitted in any relevant BMJ Author's Self Archiving Policies, I confirm this Work has not been accepted for publication elsewhere, is not being considered for publication elsewhere and does not duplicate material already published. I confirm all authors consent to publication of this Work and authorise the granting of this licence.

## Puberty, sex, and behavior in neurodevelopmental disorders versus typical development

### Authors:

1. Melanie Penner MD MSc FRCP(C): Bloorview Research Institute, Holland Bloorview Kids Rehabilitation Hospital, 150 Kilgour Rd., Toronto, Ontario, Canada; Department of Paediatrics, University of Toronto, 555 University Ave., Toronto, Ontario, Canada; [mpenner@hollandbloorview.ca](mailto:mpenner@hollandbloorview.ca)
2. Annie Dupuis PhD: Dalla Lana School of Public Health, University of Toronto, 155 College St., Toronto, Ontario, Canada; [annie.dupuis@mdstats.ca](mailto:annie.dupuis@mdstats.ca)
3. Paul Arnold MD PhD FRCP(C): The Mathison Centre for Mental Health Research & Education, Hotchkiss Brain Institute, Cumming School of Medicine, University of Calgary. 4D60, Teaching, Research and Wellness (TRW) Building, 3280 Hospital Dr NW, Calgary AB, Canada. T2N 4Z6. [Paul.arnold@ucalgary.ca](mailto:Paul.arnold@ucalgary.ca)
4. Muhammad Ayub MBBS MRCPsych MSc MD: Department of Psychiatry, Queen's University, 191 Portsmouth Ave, Kingston, Ontario, Canada; Department of Psychiatry, University College London, London, UK; [ma84@queensu.ca](mailto:ma84@queensu.ca)
5. Jennifer Crosbie PhD: Department of Psychiatry, Hospital for Sick Children, 555 University Ave., Toronto, Ontario, Canada; [jennifer.crosbie@sickkids.ca](mailto:jennifer.crosbie@sickkids.ca)
6. Stelios Georgiades PhD: Department of Psychiatry and Behavioural Neurosciences, McMaster University, 175 Longwood Ave. S., Hamilton, Ontario, Canada; [georgis@mcmaster.ca](mailto:georgis@mcmaster.ca)
7. Elizabeth Kelley PhD: Department of Psychology, Queen's University, 62 Arch St. Kingston, Ontario, Canada; [kellyb@queensu.ca](mailto:kellyb@queensu.ca)

- 1  
2  
3 8. Robert Nicolson MD FRCP(C): Department of Psychiatry, Western University,  
4 Parkwood Institute, Mental Health Care Building, London, Ontario, Canada;  
5  
6 [micolso@uwo.ca](mailto:micolso@uwo.ca)  
7  
8  
9  
10 9. Russell Schachar MD FRCP(C): Department of Psychiatry, Hospital for Sick Children,  
11 555 University Ave., Toronto, Ontario, Canada; [russell.schachar@sickkids.ca](mailto:russell.schachar@sickkids.ca)  
12  
13  
14 10. Evdokia Anagnostou MD: Bloorview Research Institute, Holland Bloorview Kids  
15 Rehabilitation Hospital, 150 Kilgour Rd., Toronto, Ontario, Canada; Department of  
16 Paediatrics, University of Toronto, 555 University Ave., Toronto, Ontario, Canada;  
17  
18 [eanagnostou@hollandbloorview.ca](mailto:eanagnostou@hollandbloorview.ca)  
19  
20  
21  
22  
23  
24  
25  
26

27 **Address correspondence to:** Melanie Penner, Child Development Program, Holland Bloorview  
28 Kids Rehabilitation Hospital, 150 Kilgour Rd., Toronto, Ontario, M4G 1R8,  
29 [mpenner@hollandbloorview.ca](mailto:mpenner@hollandbloorview.ca), 416-425-6220  
30  
31  
32  
33

34 **Word count:** 2492  
35  
36  
37

38 **Funding:** This research was conducted with the support of the Ontario Brain Institute (POND,  
39 PIs: Anagnostou/Lerch; award number: Not Applicable), an independent non-profit corporation,  
40 funded partially by the Ontario government. The opinions, results and conclusions are those of  
41 the authors and no endorsement by the Ontario Brain Institute is intended or should be inferred.  
42  
43 The funding body has not directly influenced the research question, data analysis, or  
44  
45 interpretation of the findings of this study.  
46  
47  
48  
49  
50  
51  
52  
53  
54  
55  
56  
57  
58  
59  
60

## Abstract

**Objective:** To determine the association between pubertal stage, sex, and behavioral profile across and within neurodevelopmental disorders (NDDs) compared to typically developing (TD) youth.

**Methods:** This was a cross-sectional study from the Province of Ontario Neurodevelopmental Disorders network, including children/youth with various NDDs and TD controls. Caregivers completed the Child Behavior Checklist (CBCL). Participants were grouped into three pubertal stages: pre-pubertal (Tanner 1), early puberty (Tanner 2-3), and late puberty (Tanner 4-5). The association between pubertal stage and CBCL scores was assessed controlling for sex and diagnosis.

**Results:** The analysis included 1,043 participants (male=733; 70.3%). A three-way interaction between pubertal status, sex, and diagnosis was not significant for internalizing or externalizing behavior. Diagnosis was significantly associated with CBCL scores for both internalizing ( $p<0.0001$ ) and externalizing ( $p<0.0001$ ) behavior, with lower scores for TD children than for NDD groups. Late pubertal females showed higher levels of internalizing behavior compared to pre-puberty females ( $p=0.001$ ); males showed no differences. Early pubertal males showed lower levels of externalizing behavior compared to pre-puberty ( $p=0.01$ ); early puberty females trended toward higher levels compared to pre-puberty females ( $p=0.051$ ).

**Conclusions:** Internalizing/externalizing patterns of behaviors across pubertal stages did not differ based on diagnosis. Pubertal females are at higher risk for internalizing behaviors.

**Keywords:** Puberty, Behavior, Developmental disorders

**Key Messages:**

*What is already known on this topic:*

Existing studies of behavior and puberty in neurodevelopmental disorders have focused on small groups of children/youth within specific diagnoses and have not included typically developing controls.

*What this study adds:* Our study looked at a large sample of children/youth with neurodevelopmental disorders, as well as typically developing controls, to examine the association between puberty stage, sex, and behavior. Children/youth with neurodevelopmental disorders show similar patterns of behavior levels across stages of puberty compared to typically developing controls; however, they have consistently higher levels of internalizing and externalizing behavior across all stages compared to their typically developing peers. In both the neurodevelopmental and typically developing groups, females showed higher internalizing behavior (e.g. anxiety, low mood) in pubertal stages compared to pre-pubertal stages.

*How this study might affect research, practice or policy:* Clinicians should be aware of the potential for worsening mental health symptoms during puberty, particularly for females.

## Background:

Parents and clinicians perceive puberty as a time of worsening mental health and behavior, particularly in children and youth with neurodevelopmental disorders (NDD).<sup>1,2</sup> Surprisingly, this belief is based on relatively little evidence. Such information is critically important to provide anticipatory guidance to adolescents with NDDs and their families and to assist health care practitioners in assessment and management of mood and behavior issues during puberty.

Puberty is a period associated with biological, social, and behavioral changes.<sup>3</sup> It is also a sensitive period for organization in the brain with the potential for long-lasting effects on brain function and behaviour.<sup>4</sup> Bodily appearance, cognition, and behavioral systems mature at different rates and are influenced by both shared and independent stimuli; disruptions in coordination of these developing systems can lead to particular vulnerability due to mismatch of motivation/arousal and the capacity to regulate thoughts, emotions, and behaviors.<sup>5</sup> These individual changes occur in a social milieu, which itself affects and is affected by individual pubertal processes in a complex relationship between neurodevelopment, puberty, and the social environment.<sup>6</sup>

Youth with NDDs, such as autism spectrum disorder (ASD), attention deficit/hyperactivity disorder (ADHD), and obsessive-compulsive disorder (OCD) may be at additional risk for mental health issues and interfering behaviour during puberty.<sup>3,7</sup> Sex differences exist in each of these disorders,<sup>8-10</sup> indicating a possible contributory role of exposure to sex steroids early in development<sup>11,12</sup> and raising the possibility that hormone exposure during puberty might lead to further neurodevelopmental differences. In addition, research has shown that children across NDDs exhibit social difficulties.<sup>13</sup> The relationship between social



1  
2  
3 development and neurodevelopment during puberty suggests further vulnerability for children  
4 with NDDs during this period that can have lasting impacts on neuronal organization.  
5  
6

7  
8 Despite this increased vulnerability, relatively few studies have evaluated the association  
9  
10 between puberty and mental health/behaviour in youth with NDDs, particularly compared to  
11 typically developing (TD) groups. Case series in ASD have suggested that peri-pubertal  
12 behavioral deterioration may occur in up to one third of youth.<sup>7,14,15</sup> There is retrospective  
13 evidence that early puberty (as reported by university-aged females with ADHD) is associated  
14 with increased ADHD symptomatology,<sup>16</sup> though there is no report of symptoms through the  
15 duration of puberty. The onset of OCD in women has been linked to reproductive cycle events,  
16 including 13% of women reporting onset of OCD in the year after menarche.<sup>17</sup>  
17  
18  
19  
20  
21  
22  
23  
24  
25

26 These reports, while limited, suggest potential vulnerability in children and youth with  
27 NDDs during puberty that extends beyond emotional and behavioural changes typically  
28 experienced during this time.<sup>18</sup> Unfortunately, all work to date has focused within specific  
29 diagnoses, limiting our ability to understand shared vulnerability during puberty across NDDs.  
30  
31 Importantly, this information can refine pubertal guidance provided to families of adolescents  
32 with NDDs. The objective of this study was to evaluate the relationship between stage of puberty  
33 and internalizing/externalizing behavior within and across various NDDs, accounting for sex  
34 differences.  
35  
36  
37  
38  
39  
40  
41  
42  
43  
44  
45  
46

## 47 **Methods:**

### 48 *Setting and Participants*

49  
50 This was a cross-sectional study using data collected through the Ontario Brain  
51 Institute Province of Ontario Neurodevelopmental Disorders (OBI-POND) network. OBI-POND  
52  
53  
54  
55  
56  
57  
58  
59  
60

1  
2  
3 is a research collaboration across five Ontario centers (redacted names). OBI-POND enrolls  
4 children with NDDs, including ASD, ADHD, OCD, as well as typically developing (TD)  
5 controls. All caregivers provided informed consent for enrollment in OBI-POND (participants  
6 who were capable provided informed consent for their participation). Participants for this  
7 analysis were enrolled between February 2012 and March 2019. All OBI-POND participants  
8 aged eight or older were screened for inclusion in the present analysis. Participants who  
9 completed both the Child Behavior Checklist (CBCL) and the Tanner staging form were  
10 included.  
11  
12  
13  
14  
15  
16  
17  
18  
19  
20

21 Participants with a primary diagnosis of ASD, ADHD, and OCD were included in the  
22 analysis, along with TD controls. Diagnostic assessments were performed on all OBI-POND  
23 participants to confirm their reported clinical diagnosis. These included the Autism Diagnostic  
24 Observation Schedule<sup>19</sup> and the Autism Diagnostic Interview – Revised<sup>20</sup> for participants with  
25 ASD, The Schedule for Affective Disorders and Schizophrenia, Childhood Version (K-SADS)<sup>21</sup>  
26 and the Parent interview for Child Symptoms<sup>22</sup> for participants with ADHD, and the K-SADS  
27 and the Children’s Yale-Brown Obsessive Compulsive Scale for Children<sup>23</sup> for participants with  
28 OCD. Participants with sub-threshold diagnoses were excluded.  
29  
30  
31  
32  
33  
34  
35  
36  
37  
38  
39  
40  
41

#### 42 *Measures*

43  
44 As part of the OBI-POND protocol, all participants had caregivers complete the Child  
45 Behavior Checklist (CBCL).<sup>24</sup> The CBCL is a reliable and validated behavioral questionnaire  
46 that has been used in many observational studies.<sup>25</sup> CBCL T-scores for internalizing and  
47 externalizing behavior were used as the dependent variables in the analyses. These are norm-  
48 referenced for a general population sample in the same age-range and sex with an expected mean  
49  
50  
51  
52  
53  
54  
55  
56  
57  
58  
59  
60

1  
2  
3 of 50 across all ages; as such, any effects of puberty would be above and beyond those expected  
4  
5 based on age and sex.

6  
7  
8 Participants aged eight years or older (or their caregivers when research  
9  
10 staff/caregivers felt that participants were not able) completed a Tanner staging form, where  
11  
12 penile/breast stages of growth (SOG) and pubic hair (PH) development are both reported  
13  
14 compared to reference pictures on a scale of one (pre-pubertal) to five (post-pubertal).<sup>26,27</sup> To  
15  
16 ensure that SOG and PH were included, these ratings were combined into one categorical  
17  
18 variable representing pubertal status. The mean of the SOG and PH ratings was calculated for  
19  
20 each participant, with any scores between whole integers rounded down. For participants who  
21  
22 had only reported one of PH or SOG, that stage was used as their overall Tanner rating. Tanner  
23  
24 ratings were then recorded as pre-pubertal (stage 1), early pubertal (stages 2-3), and late pubertal  
25  
26 (stage 4-5).  
27  
28  
29

30  
31 One thousand and sixty-six participants completed pubertal staging and the CBCL. To  
32  
33 ensure that pubertal staging was contemporaneous with the CBCL, 17 participants with a gap of  
34  
35 six months or longer between the two measures were excluded. Six participants reported a  
36  
37 difference of more than two stages between PH and SOG and were excluded due to concerns  
38  
39 about reliability of reporting.  
40  
41

42 Sex and primary neurodevelopmental diagnosis were included as additional  
43  
44 covariables in the model. Information on gender was available for <10% of our sample (77  
45  
46 participants) because it was not collected as part of OBI-POND until 2019. For this reason,  
47  
48 gender was not included in the analysis.  
49  
50

### 51 52 53 *Analysis*

1  
2  
3 Statistical analyses were completed using SAS 9.4 (2002-2012, SAS Institute Inc.,  
4 Cary, NC, USA). Descriptive statistics were used to characterize the sample. To determine if  
5 differences in internalizing and externalizing behaviors across pubertal stage varied by sex and  
6 diagnosis, we tested a 3-way interaction in an ANOVA model that allowed for heterogeneous  
7 variance across sex, pubertal stage, and diagnosis. After removing the non-significant 3-way  
8 interaction, we assessed whether behaviors across pubertal stage varied by diagnosis across  
9 males and females simultaneously by testing the pubertal stage by diagnosis 2-way interaction.  
10 Finally, after dropping both the non-significant pubertal stage by diagnosis 2-way interaction and  
11 the non-significant sex by diagnosis 2-way interaction, we report the differences in behaviors  
12 across pubertal stages for males and females separately, across all diagnoses.  
13  
14  
15  
16  
17  
18  
19  
20  
21  
22  
23  
24  
25  
26  
27

#### 28 *Ethics approval:*

29  
30 This project received research ethics approval from Holland Bloorview Kids Rehabilitation  
31 Hospital, Toronto; The Hospital for Sick Children, Toronto; McMaster Children's Hospital,  
32 Hamilton; Lawson Health Research Institute, London and Queen's University, Kingston.  
33 Informed consent was provided by all capable participants and by caregivers for participants who  
34 were not capable of providing consent.  
35  
36  
37  
38  
39  
40  
41  
42  
43  
44

#### 45 *Patient and Public Involvement:*

46 POND has a Participant Advisory Committee (families and stakeholders from NDD community  
47 groups) and a Youth Advisory Committee comprised of youth with NDDs.  
48  
49  
50  
51  
52  
53

#### 54 **Results:**

1  
2  
3 One thousand and forty-three participants were included in the analysis. Demographic  
4 information for the sample is summarized in **Table 1**. For both males ( $X^2 = 33.1$ , degrees of  
5 freedom [df] 6,  $p < 0.001$ ) and females ( $X^2 = 22$ , df 6,  $p = 0.001$ ), there were significant  
6 differences in the distribution across pubertal stages, with more pre-pubertal representation in the  
7 ADHD group. The proportion of males and females by diagnostic category differed significantly  
8 ( $X^2 = 52.4$ , df 3,  $p < 0.001$ ), with ASD and ADHD showing an expected higher proportion of  
9 males. The informant (i.e., person completing the pubertal staging) also differed between the  
10 groups, with proportionately higher self-report in the TD group compared to the NDD groups ( $X^2$   
11 = 93, df 6,  $p < 0.001$ ).

#### 26 *Internalizing behavior*

27 Results for the internalizing behavior model are presented in **Table 2**. Scores in the TD group  
28 were lower than the ASD, ADHD, and OCD groups. The three-way interaction between pubertal  
29 stage, sex, and diagnosis was not significant ( $F = 1.28$ , df 6,  $p = 0.26$ ). There was a significant  
30 interaction between sex and pubertal stage ( $F = 3.55$ , df 2,  $p = 0.03$ ). Across diagnoses, males  
31 showed no significant differences in levels of internalizing behaviors based on stage of puberty.  
32 Late pubertal females had CBCL scores that were higher by 4.4 points (95% confidence interval  
33 [CI] -1.4, 3.8;  $p = 0.001$ ) compared to pre-pubertal females. This pattern significantly differed  
34 ( $p = 0.01$ ) from the pattern in males (difference between pre- and late puberty = 0.2; 95% CI -1.8,  
35 2.0;  $p = 0.8$ ).

#### 51 *Externalizing behavior*

Results for the externalizing behavior model are presented in **Table 3**. Here again, scores for the TD group were lower than for the ASD, ADHD, and OCD groups. The three-way interaction between pubertal stage, sex, and diagnosis was not significant ( $F = 0.59$ ,  $df 6$ ,  $p = 0.74$ ). There was a significant interaction between sex and pubertal stage ( $F = 6.57$ ,  $df 2$ ,  $p=0.002$ ). Early pubertal males showed lower levels of externalizing behavior compared to pre-pubertal males (difference -2.2, 95% CI -4.0, -0.5;  $p=0.01$ ). By contrast, females showed a non-significant trend toward higher levels of externalizing behavior in early puberty versus those in pre-puberty (difference 2.8, 95% CI 0, 5.7,  $p=0.051$ ). The difference in these patterns between males and females was significant ( $p=0.003$ ). While both males and females show lower levels of externalizing behaviors in late puberty compared with early puberty, these differences are not statistically significant, although clinically important effects cannot be ruled out (95%CI for males -3.6,0.3 and 95%CL for females -4.0 to 1.4).

### **Discussion:**

To our knowledge, this is the first study to examine the association between pubertal stage and behavioral profile across various NDDs. Our analysis is strengthened by the presence of a TD control group. Our results show that the pattern of behaviors across pubertal stages was similar between the TD group and the NDD groups. A key distinction, however, is that the CBCL scores for the TD groups were consistently lower than for the NDD groups. As such, although the pattern is similar, it is likely that families experience puberty as affecting children with NDDs more than their TD peers.

Across NDD and TD groups, the levels of internalizing behaviors were the same for males across the different pubertal stages, although the TD group had much lower scores. Across

1  
2  
3 diagnoses, females in late puberty showed higher levels of internalizing behavior compared to  
4 their pre-pubertal counterparts, a pattern which differed significantly from their male peers. Our  
5 results echo findings in the general population that have shown increases in anxiety<sup>28</sup> and  
6 depression<sup>29</sup> over the adolescent years that are greater for females compared to males. In NDD  
7 populations, Gotham, Brunwasser and Lord<sup>30</sup> measured internalizing behaviors longitudinally in  
8 adolescent groups with ASD and with developmental delays and found that increases in  
9 internalizing behaviors with age were greater for females compared to males. Pubertal stage was  
10 not measured in their analysis. Overall, these findings endorse heightened surveillance for  
11 internalizing behaviors in females with pubertal onset.  
12  
13  
14  
15  
16  
17  
18  
19  
20  
21  
22

23  
24 Our data showed lower levels of externalizing behaviors in early pubertal males  
25 compared to pre-pubertal males. This difference in levels was significantly different from the  
26 pattern in females, which showed a trend (non-significant) toward increased externalizing  
27 behaviors. Patterns for externalizing behaviors during adolescence are mixed in the existing  
28 literature. One large Dutch cross-sectional study in a general population of youth found an  
29 increasing prevalence of externalizing behaviors with each successive Tanner stage in both males  
30 and females.<sup>31</sup> An older UK-based study of levels of aggression in a typically developing  
31 population of participants found that males started with higher levels of self-reported aggression,  
32 but by late puberty there were no differences between males and females.<sup>32</sup> Verbal aggression  
33 against adults increased over the adolescent years; however, this increase was more pronounced  
34 among girls. The literature is somewhat sparser when considering NDD groups. A Swiss study of  
35 adolescents with ADHD reported decreasing aggression across the adolescent years but did not  
36 separate males and females.<sup>33</sup> A longitudinal study of children/youth with ASD showed general  
37 patterns of decreasing hyperactivity, and to a lesser extent, irritability, across the adolescent  
38  
39  
40  
41  
42  
43  
44  
45  
46  
47  
48  
49  
50  
51  
52  
53  
54  
55  
56  
57  
58  
59  
60

1  
2  
3 years but again did not distinguish by sex. Our results suggest that, similar to internalizing  
4 behaviors, females might be at higher risk for externalizing behaviors during adolescence. More  
5 work is needed to determine the nature of these behaviors in NDD groups, such as increased  
6 verbal aggression as suggested by studies of adolescents in the general population.  
7  
8  
9  
10

11  
12 There are important limitations to our analysis. The data were cross-sectional and did  
13 not capture individual behavioral trajectories throughout puberty. We were unable to distinguish  
14 between puberty-related effects and age-related effects due to the cross-sectional nature of the  
15 study; to mitigate this limitation, we used CBCL T-scores in order to capture pubertal effects  
16 beyond those expected based on age. This analysis did not include whether puberty occurred  
17 early or late, both of which have been linked to depressive symptoms in late adolescence.<sup>34</sup>  
18  
19 Longitudinal studies measuring pubertal stage and behavior are needed to optimally disentangle  
20 the effects of age and puberty. Caregivers provided the majority of pubertal staging, which may  
21 not be reliable, particularly for children/youth with lower support needs. Both self-report and  
22 caregiver-report of Tanner PH stage have been shown to have good reliability in typically  
23 developing females,<sup>35</sup> though self-report in males is less accurate.<sup>36</sup> Reports of Tanner staging  
24 were chosen over clinician examination to minimize the intrusiveness of participation, allowing  
25 for a larger sample size, similar to other studies.<sup>31</sup> We did not have access to information about  
26 gender for the vast majority of our sample. Future attention should be paid to the ways in which  
27 gender, particularly non-cisgender, interacts with puberty in NDDs. Finally, Tanner staging is a  
28 proxy for the internal hormonal states that are thought to influence behavior;<sup>37,38</sup> fluctuations in  
29 hormonal states are not perfectly represented by external appearance.  
30  
31  
32  
33  
34  
35  
36  
37  
38  
39  
40  
41  
42  
43  
44  
45  
46  
47  
48  
49  
50

51 In conclusion, our analysis failed to find unique patterns of internalizing and  
52 externalizing behavior in children/youth with NDDs compared to TD peers. Children with NDDs  
53  
54  
55  
56  
57  
58  
59  
60



1  
2  
3 had higher levels of behaviors compared to TD peers, which might accentuate caregiver  
4  
5 perceptions of behavior changes during the pubertal period. Important sex differences emerged,  
6  
7 with females showing significantly higher levels of internalizing behavior at later pubertal stages  
8  
9 and a pattern of higher externalizing behaviors with pubertal onset compared to males. Puberty  
10  
11 represents an important milestone for adolescents both with and without NDDs, and as such an  
12  
13 important opportunity for anticipatory guidance. Our results suggest that females, particularly  
14  
15 those with NDDs, should be monitored for affective disorders. Further study is needed on the  
16  
17 associations between puberty, sex, and externalizing behaviors in NDD populations. In the  
18  
19 future, longitudinal cohort designs will allow for optimal study of the effects of puberty and  
20  
21 behaviors in NDD populations.  
22  
23  
24  
25  
26  
27  
28  
29  
30  
31  
32  
33  
34  
35  
36  
37  
38  
39  
40  
41  
42  
43  
44  
45  
46  
47  
48  
49  
50  
51  
52  
53  
54  
55  
56  
57  
58  
59  
60

**References:**

1. Autism Treatment Network. Puberty and Adolescence Resource: a Guide for Parents of Adolescents with Autism Spectrum Disorder. Autism Speaks. December 12, 2016.  
[https://www.autismspeaks.org/sites/default/files/documents/atn/puberty\\_tool\\_kit.pdf](https://www.autismspeaks.org/sites/default/files/documents/atn/puberty_tool_kit.pdf)
2. Theobald M. When ADHD Meets Puberty: One Mom's Story. *Everyday Health* blog. December 12, 2013. <http://www.everydayhealth.com/adhd/when-adhd-meets-puberty-one-moms-story.aspx>
3. Patton GC, Viner R. Pubertal transitions in health. *Lancet*. 2007;369(9567):1130-1139.
4. Gur RE, Gur, R.C. Sex differences in brain and behavior in adolescence: Findings from the Philadelphia Neurodevelopmental Cohort. *Neuroscience and Biobehavioral Reviews*. 2016;70(2016):159-70.
5. Steinberg L. Cognitive and affective development in adolescence. *Trends in cognitive sciences*. 2005;9(2):69-74.
6. Spear LP. The adolescent brain and age-related behavioral manifestations. *Neuroscience & biobehavioral reviews*. 2000;24(4):417-463.
7. Gillberg C, Steffenburg S. Outcome and prognostic factors in infantile autism and similar conditions: a population-based study of 46 cases followed through puberty. *Journal of Autism & Developmental Disorders*. 1987;17(2):273-287.
8. Lai MC, Lerch JP, Floris DL, et al. Imaging sex/gender and autism in the brain: Etiological implications. *Journal of Neuroscience Research*. 2017;95(1):380-397.
9. Loke H, Harley V, Lee J. Biological factors underlying sex differences in neurological disorders. *The International Journal of Biochemistry and Cell Biology*. 2015;65:139-50.

10. Mathes BM, Morabito DM, Schmidt NB. Epidemiological and clinical gender differences in OCD. *Current Psychiatry Reports*. 2019;21(5):1-7.
11. Kosidou K, Dalman C, Widman L, et al. Maternal polycystic ovary syndrome and the risk of autism spectrum disorders in the offspring: a population-based nationwide study in Sweden. *Molecular Psychiatry*. 2016;21(10):1441-8.
12. Kosidou K, Dalman C, Widman L, et al. Maternal polycystic ovary syndrome and the risk for attention-deficit/hyperactivity disorder in the offspring. *Biological Psychiatry*. 2016;Epub ahead of print
13. Baribeau DA, Doyle-Thomas KA, Dupuis A, et al. Examining and comparing social perception abilities across childhood-onset neurodevelopmental disorders. *Journal of the American Academy of Child & Adolescent Psychiatry*. 2015;54(6):479-86.
14. Gillberg C. Autistic children growing up: problems during puberty and adolescence. *Developmental Medicine & Child Neurology*. 1984;26(1):125-129.
15. Gillberg C, Schaumann H. Infantile autism and puberty. *Journal of Autism & Developmental Disorders*. 1981;11(4):365-371.
16. Ostojic D, Miller, C.J. Association between pubertal onset and symptoms of ADHD in female university students. *Journal of Attention Disorders*. 2014;
17. Guglielmi V, Vulink, N.C., Denys, D., Wang, Y., Samuels, J.F., Nestadt, G. Obsessive-compulsive disorder and female reproductive cycle events: results from the OCD and reproduction collaborative study. *Depression and Anxiety*. 2014;31(12):979-87.
18. Rutter M, Graham, P, Chadwick, OFD, Yule, W. Adolescent turmoil: fact or fiction? *Journal of Child Psychology and Psychiatry*. 1976;17(1):35-56.

- 1  
2  
3 19. Lord C, Rutter M, Dilavore P, Risi S, Gotham K, Bishop S. *Autism Diagnostic*  
4  
5 *Observation Schedule, Second Edition*. WPS; 2012.  
6  
7  
8 20. Rutter M, Lecouteur A, Lord C. *Autism Diagnostic Interview - Revised (ADI-R)*. WPS;  
9  
10 2003.  
11  
12 21. Ambrosini PJ. Historical development and present status of the Schedule for Affective  
13  
14 Disorders and Schizophrenia for School-Age Children (K-SADS). *Journal of the American*  
15  
16 *Academy of Child & Adolescent Psychiatry*. 2000;39(1):49-58.  
17  
18  
19 22. Ickowicz A, Schachar RJ, Sugarman R, Chen SX, Millette C, Cook L. The parent  
20  
21 interview for child symptoms: a situation-specific clinical research interview for attention-deficit  
22  
23 hyperactivity and related disorders. *The Canadian Journal of Psychiatry*. 2006;51(5):325-328.  
24  
25  
26 23. Scahill L, Riddle MA, McSwiggin-Hardin M, et al. Children's Yale-Brown Obsessive  
27  
28 Compulsive Scale: reliability and validity. *J Am Acad Child Adolesc Psychiatry*. 1997;36(6):844-  
29  
30 52.  
31  
32  
33 24. Achenbach TM, Rescorla LA. *Manual for the ASEBA school-age forms and profiles*.  
34  
35 University of Vermont Research Centre for Children, Youth & Families; 2001.  
36  
37  
38 25. NICHD Early Child Care Research Network. Child care and child development: Results  
39  
40 from the NICHD study of early child care and youth development. U. S. Department of Health  
41  
42 and Human Services,. Accessed October 22, 2018.  
43  
44 [https://www.nichd.nih.gov/sites/default/files/publications/pubs/documents/seccyd\\_06.pdf](https://www.nichd.nih.gov/sites/default/files/publications/pubs/documents/seccyd_06.pdf)  
45  
46  
47 26. Komorniczak M. The Tanner scale (also known as the Tanner stages/staging) - Female.  
48  
49 Wikimedial Commons; 2009.  
50  
51  
52 27. Komorniczak M. The Tanner scale (also known as the Tanner stages/staging) - Male.  
53  
54 Wikimedia Commons; 2009.  
55  
56  
57  
58  
59  
60

- 1  
2  
3 28. Essau CA, Conradt J, Petermann F. Frequency, comorbidity, and psychosocial  
4 impairment of anxiety disorders in German adolescents. *Journal of Anxiety Disorders*.  
5  
6 2000;14(3):263-279.  
7  
8  
9  
10 29. Hankin BL, Abramson LY, Moffitt TE, Silva PA, McGee R, Angell KE. Development of  
11 depression from preadolescence to young adulthood: emerging gender differences in a 10-year  
12 longitudinal study. *Journal of Abnormal Psychology*. 1998;107(1):128.  
13  
14  
15  
16  
17 30. Gotham K, Brunwasser SM, Lord C. Depressive and anxiety symptom trajectories from  
18 school age through young adulthood in samples with autism spectrum disorder and  
19 developmental delay. *Journal of the American Academy of Child & Adolescent Psychiatry*.  
20  
21 2015;54(5):369-376.e3. doi:10.1016/j.jaac.2015.02.005  
22  
23  
24  
25  
26 31. Oldehinkel AJ, Verhulst FC, Ormel J. Mental health problems during puberty: Tanner  
27 stage-related differences in specific symptoms. The TRAILS study. *Journal of adolescence*.  
28  
29 2011;34(1):73-85.  
30  
31  
32  
33 32. Finkelstein JW, Von Eye A, Preece MA. The relationship between aggressive behavior  
34 and puberty in normal adolescents: A longitudinal study. *Journal of Adolescent Health*.  
35  
36 1994;15(4):319-326.  
37  
38  
39  
40 33. Murray AL, Obsuth I, Zirk-Sadowski J, Ribeaud D, Eisner M. Developmental relations  
41 between ADHD symptoms and reactive versus proactive aggression across childhood and  
42 adolescence. *Journal of attention disorders*. 2020;24(12):1701-1710.  
43  
44  
45  
46  
47 34. Benoit A, Lacourse E, Claes M. Pubertal timing and depressive symptoms in late  
48 adolescence: The moderating role of individual, peer, and parental factors. *Development and*  
49  
50 *Psychopathology*. 2013;25(2):455-471.  
51  
52  
53  
54  
55  
56  
57  
58  
59  
60

- 1  
2  
3 35. Brooks-Gunn J, Warren MP, Rosso J, Gargiulo J. Validity of self-report measures of  
4 girls' pubertal status. *Child development*. 1987;58(3):829-841.  
5  
6  
7 36. Neinstein LS. Adolescent self-assessment of sexual maturation: reassessment and  
8 evaluation in a mixed ethnic urban population. *Clinical pediatrics*. 1982;21(8):482-484.  
9  
10 37. Brooks-Gunn J, Warren MP. Biological and social contributions to negative affect in  
11 young adolescent girls. *Child development*. 1989;60(1):40-55.  
12  
13 38. Olweus D, Mattsson A, Schalling D, Low H. Testosterone, aggression, physical, and  
14 personality dimensions in normal adolescent males. *Psychosomatic medicine*. 1980;42(2):253-  
15 269.  
16  
17  
18  
19  
20  
21  
22  
23  
24  
25  
26  
27  
28  
29  
30  
31  
32  
33  
34  
35  
36  
37  
38  
39  
40  
41  
42  
43  
44  
45  
46  
47  
48  
49  
50  
51  
52  
53  
54  
55  
56  
57  
58  
59  
60

Table 1: Sample Characteristics

|                                     | Typically Developing |            | ASD         |            | ADHD        |             | OCD         |             |
|-------------------------------------|----------------------|------------|-------------|------------|-------------|-------------|-------------|-------------|
|                                     | Male                 | Female     | Male        | Female     | Male        | Female      | Male        | Female      |
| n                                   | 78                   | 53         | 351         | 100        | 226         | 79          | 78          | 78          |
| Race/ethnicity n (% of non-missing) |                      |            |             |            |             |             |             |             |
| Arab                                | 1 (1)                | 0          | 2 (1)       | 1 (1)      | 4 (3)       | 1 (2)       | 2 (4)       | 0           |
| Black                               | 3 (4)                | 1 (2)      | 16 (7)      | 1 (1)      | 4 (3)       | 6 (10)      | 0           | 2 (5)       |
| Chinese                             | 7 (9)                | 4 (8)      | 7 (3)       | 4 (6)      | 6 (4)       | 2 (3)       | 1 (2)       | 1 (3)       |
| East Asian                          | 1 (1)                | 0          | 1 (<1)      | 0          | 0           | 0           | 2 (4)       | 0           |
| Indigenous                          | 1 (1)                | 0          | 14 (6)      | 4 (6)      | 5 (3)       | 5 (8)       | 1 (2)       | 0           |
| Japanese                            | 2 (3)                | 1 (2)      | 1 (<1)      | 0          | 0           | 0           | 0           | 0           |
| Jewish                              | 1 (1)                | 1 (2)      | 10 (4)      | 3 (4)      | 19 (13)     | 8 (13)      | 1 (2)       | 1 (3)       |
| Korean                              | 0                    | 1 (2)      | 0           | 1 (1)      | 0           | 0           | 2 (4)       | 0           |
| American/Hispanic                   | 5 (6)                | 0          | 11 (5)      | 0          | 7 (5)       | 1 (2)       | 0           | 2 (5)       |
| South Asian                         | 4 (5)                | 3 (6)      | 5 (2)       | 2 (3)      | 4 (3)       | 2 (3)       | 5 (11)      | 0           |
| Southeast Asian                     | 0                    | 1 (2)      | 2 (1)       | 2 (3)      | 0           | 1 (2)       | 0           | 0           |
| West Asian                          | 0                    | 0          | 2 (1)       | 0          | 4 (3)       | 1 (2)       | 3 (6)       | 0           |
| White                               | 60 (77)              | 47 (89)    | 195 (83)    | 57 (83)    | 116 (78)    | 51 (84)     | 42 (89)     | 34 (89)     |
| Missing Ethnicity                   | 0                    | 0          | 115 (33)    | 31 (31)    | 77 (34)     | 18 (23)     | 31 (40)     | 40 (51)     |
| Pubertal stage, n (%)               |                      |            |             |            |             |             |             |             |
| Pre puberty                         | 26 (33)              | 18 (34)    | 136 (39)    | 25 (25)    | 127 (56)    | 34 (43)     | 28 (36)     | 15 (19)     |
| Puberty                             | 29 (37)              | 15 (28)    | 109 (31)    | 28 (28)    | 70 (31)     | 30 (38)     | 28 (36)     | 25 (32)     |
| Late puberty                        | 23 (29)              | 20 (38)    | 107 (30)    | 47 (47)    | 29 (13)     | 15 (19)     | 22 (28)     | 38 (49)     |
| Informant, n (%)                    |                      |            |             |            |             |             |             |             |
| Missing                             | 4 (5)                | 3 (6)      | 16 (5)      | 7 (7)      | 15 (7)      | 3 (4)       | 4 (5)       | 2 (3)       |
| Parent                              | 25 (32)              | 21 (40)    | 269 (77)    | 70 (70)    | 165 (73)    | 59 (75)     | 56 (72)     | 53 (68)     |
| Self                                | 49 (63)              | 29 (55)    | 66 (19)     | 23 (23)    | 46 (20)     | 17 (22)     | 18 (23)     | 23 (29)     |
| Mean (sd)                           |                      |            |             |            |             |             |             |             |
| Age                                 | 12.4 (2.7)           | 12.9 (3.2) | 12.4 (2.9)  | 12.6 (3.0) | 11.0 (2.5)  | 10.8 (2.4)  | 12.6 (2.6)  | 13.5 (2.5)  |
| CBCL externalizing                  | 42.7 (8.9)           | 42.5 (7.8) | 56.5 (10.6) | 57.1 (8.9) | 61.0 (10.7) | 61.0 (10.6) | 49.6 (10.9) | 53.5 (10.7) |
| CBCL internalizing                  | 47.2 (9.0)           | 47.3 (9.3) | 62.5 (9.4)  | 62.6 (9.6) | 61.0 (10.3) | 60.3 (11.4) | 63.5 (10.9) | 63.7 (10.0) |

Child-level ethnicity data were not collected from study inception, leading to a high level of missing data. More than one ethnicity could be reported, meaning percentages will not sum to 100%. Pre-puberty: Tanner stage 1; Early puberty: Tanner stages 2-3; Late puberty: Tanner stages

1  
2  
3 4-5. ADHD: attention-deficit/hyperactivity disorder; ASD: autism spectrum disorder; CBCL: Child Behavior Checklist; OCD: obsessive  
4 compulsive disorder; sd: standard deviation  
5  
6  
7  
8  
9  
10  
11  
12  
13  
14  
15  
16  
17  
18  
19  
20  
21  
22  
23  
24  
25  
26  
27  
28  
29  
30  
31  
32  
33  
34  
35  
36  
37  
38  
39  
40  
41  
42  
43  
44  
45  
46  
47

Confidential: For Review Only



**Table 2: Multivariable linear regression<sup>1</sup> CBCL internalizing behavior predicted scores and score differences**

|                          |      | Puberty stages    |                   |                   | Puberty stage differences |                  |                   |
|--------------------------|------|-------------------|-------------------|-------------------|---------------------------|------------------|-------------------|
|                          |      | Pre-puberty       | Early Puberty     | Late puberty      | Pre to Early              | Early to Late    | Pre to Late       |
| <b>Males</b>             |      |                   |                   |                   |                           |                  |                   |
|                          | TD   | 47.2 (45.3, 49.1) | 47.4 (45.4, 49.3) | 47.4 (45.4, 49.5) |                           |                  |                   |
|                          | ASD  | 62.4 (61.1, 63.7) | 62.5 (61.1, 63.9) | 62.6 (61.1, 64.1) | 0.1 (-1.5, 1.8)           | 0.1 (-1.8, 2.0)  | 0.2 (-1.6, 2.0)   |
|                          | ADHD | 61.0 (59.5, 62.4) | 61.1 (59.5, 62.7) | 61.2 (59.3, 63.0) |                           |                  |                   |
|                          | OCD  | 63.3 (61.3, 65.2) | 63.4 (61.4, 65.4) | 63.5 (61.4, 65.6) |                           |                  |                   |
| <b>Females</b>           |      |                   |                   |                   |                           |                  |                   |
|                          | TD   | 44.5 (42.1, 46.9) | 47.7 (45.3, 50.1) | 48.9 (46.7, 51.2) |                           |                  |                   |
|                          | ASD  | 59.7 (57.5, 61.9) | 62.9 (60.8, 65.0) | 64.1 (62.2, 66.0) | 3.2 (0.4, 6.0)            | 1.2 (-1.4, 3.8)  | 4.4 (1.7, 7.1)    |
|                          | ADHD | 58.2 (56.0, 60.5) | 61.5 (59.2, 63.7) | 62.7 (60.5, 64.8) | <i>p</i> = .025           |                  | <i>p</i> = .001   |
|                          | OCD  | 60.6 (58.1, 63.1) | 63.8 (61.4, 66.1) | 65.0 (62.9, 67.1) |                           |                  |                   |
| <b>Males vs. Females</b> |      |                   |                   |                   |                           |                  |                   |
|                          |      |                   |                   |                   | -3.1 (-6.3, 0.2)          | -1.1 (-4.4, 2.1) | -4.2 (-7.4, -1.0) |
|                          |      |                   |                   |                   |                           |                  | <i>p</i> = .010   |

<sup>1</sup> Pubertal stage ( $F(2,1034) = 4.1, p = .02$ ); Sex ( $F(1,1034) = 0.2, p = 0.7$ ); Diagnosis ( $F(3,1034) = 100.7, p < .0001$ ); Sex x Pubertal stage ( $F(2,1034) = 3.6, p = .03$ )

Pre-puberty: Tanner stage 1; Early puberty: Tanner stages 2-3; Late puberty: Tanner stages 4-5. ADHD: attention-deficit/hyperactivity disorder; ASD: autism spectrum disorder; CBCL: Child Behavior Checklist; OCD: obsessive compulsive disorder; TD: typically developing

**Table 3: Multivariable linear regression<sup>1</sup> CBCL externalizing behavior predicted scores and score differences**

|                          |      | Puberty stages    |                   |                   | Puberty stage differences |                  |                   |
|--------------------------|------|-------------------|-------------------|-------------------|---------------------------|------------------|-------------------|
|                          |      | Pre-puberty       | Early Puberty     | Late puberty      | Pre to Early              | Early to Late    | Pre to Late       |
| <b>Males</b>             |      |                   |                   |                   |                           |                  |                   |
|                          | TD   | 44.2 (42.4, 46.0) | 42.0 (40.1, 43.8) | 40.3 (38.3, 42.3) |                           |                  |                   |
|                          | ASD  | 58.3 (57.0, 59.7) | 56.1 (54.6, 57.5) | 54.4 (52.9, 56.0) | -2.2 (-4.0, -0.5)         | -1.7 (-3.6, 0.3) | -3.9 (-5.8, -2.0) |
|                          | ADHD | 62.2 (60.7, 63.6) | 59.9 (58.3, 61.6) | 58.3 (56.4, 60.2) | <i>p</i> = .010           |                  | <i>p</i> < .0001  |
|                          | OCD  | 52.9 (50.8, 55.0) | 50.7 (48.6, 52.8) | 49.0 (46.8, 51.2) |                           |                  |                   |
| <b>Females</b>           |      |                   |                   |                   |                           |                  |                   |
|                          | TD   | 41.8 (39.5, 44.1) | 44.6 (42.3, 47.0) | 43.3 (41.2, 45.5) |                           |                  |                   |
|                          | ASD  | 55.9 (53.7, 58.2) | 58.8 (56.6, 61.0) | 57.5 (55.5, 59.4) | 2.8 (0.0, 5.7)            | -1.3 (-4.0, 1.4) | 1.5 (-1.2, 4.3)   |
|                          | ADHD | 59.8 (57.5, 62.0) | 62.6 (60.3, 64.9) | 61.3 (59.1, 63.5) |                           |                  |                   |
|                          | OCD  | 50.5 (47.9, 53.1) | 53.3 (50.9, 55.8) | 52.0 (49.8, 54.3) |                           |                  |                   |
| <b>Males vs. Females</b> |      |                   |                   |                   |                           |                  |                   |
|                          |      |                   |                   |                   | -5.1 (-8.4, -1.8)         | -0.4 (-3.7, 2.9) | -5.4 (-8.7, -2.2) |
|                          |      |                   |                   |                   | <i>p</i> = .003           |                  | <i>p</i> = .001   |

<sup>1</sup> Pubertal stage ( $F(2,1034) = 1.7, p = .2$ ); Sex ( $F(1,1034) = 2.44, p = 0.1$ ); Diagnosis ( $F(3,1034) = 129, p < .0001$ ); Sex x Pubertal stage ( $F(2,1034) = 6.6, p = .002$ )

Pre-puberty: Tanner stage 1; Early puberty: Tanner stages 2-3; Late puberty: Tanner stages 4-5. ADHD: attention-deficit/hyperactivity disorder; ASD: autism spectrum disorder; CBCL: Child Behavior Checklist; OCD: obsessive compulsive disorder; TD: typically developing
