# Supplementary material for: Pubertal stage, sex and behaviour in neurodevelopmental disorders versus typical development: a cross-sectional study
Source: PubMed Central journal article supplement — BMJ Paediatr Open. 2022 Aug 23;6(1):e001469. doi: 10.1136/bmjpo-2022-001469 (PMC9403165; doi:10.1136/bmjpo-2022-001469), 2022-08-23
Supplement: bmjpo-2022-001469supp001.pdf [file bmjpo-2022-001469supp001.pdf]

**Supplementary Table 1: CBCL score differences by pubertal stage, diagnosis, and sex**

| <b>Internalizing behavior score difference: pre-puberty vs early puberty</b>  |                    |                   |                   |                  |
|-------------------------------------------------------------------------------|--------------------|-------------------|-------------------|------------------|
|                                                                               | <b>ADHD</b>        | <b>ASD</b>        | <b>OCD</b>        | <b>TD</b>        |
| Males                                                                         | 5.1 (-0.4, 10.7)   | 4.4 (-0.5, 9.3)   | 0.3 (-4.7, 5.3)   | 0.5 (-5.4, 6.4)  |
| Difference from TD                                                            | 4.6 (-3.5, 12.7)   | 3.9 (-3.8, 11.6)  | -0.2 (-7.9, 7.5)  |                  |
| Females                                                                       | 1.2 (-1.8, 4.2)    | -0.6 (-3.0, 1.8)  | 0.5 (-4.5, 5.6)   | -0.7 (-5.6, 4.3) |
| Difference from TD                                                            | 1.9 (-3.9, 7.7)    | 0.1 (-5.4, 5.6)   | 1.2 (-5.9, 8.3)   |                  |
| <b>Internalizing behavior score difference: early puberty vs late puberty</b> |                    |                   |                   |                  |
|                                                                               | <b>ADHD</b>        | <b>ASD</b>        | <b>OCD</b>        | <b>TD</b>        |
| Males                                                                         | -3.4 (-10.6, 3.8)  | 3.0 (-0.9, 6.8)   | -1.5 (-6.4, 3.5)  | 6.0 (-0.5, 12.4) |
| Difference from TD                                                            | -9.4 (-19.0, 0.3)  | -3.0 (-10.5, 4.5) | -7.4 (-15.5, 0.7) |                  |
| Females                                                                       | 0.9 (-3.3, 5.0)    | 1.0 (-1.5, 3.5)   | -1.2 (-6.8, 4.4)  | -2.7 (-7.4, 2.1) |
| Difference from TD                                                            | 3.6 (-2.8, 9.9)    | 3.6 (-1.8, 9.0)   | 1.5 (-5.9, 8.9)   |                  |
| <b>Externalizing behavior score difference: pre-puberty vs early puberty</b>  |                    |                   |                   |                  |
|                                                                               | <b>ADHD</b>        | <b>ASD</b>        | <b>OCD</b>        | <b>TD</b>        |
| Males                                                                         | 4.1 (-1.1, 9.2)    | 0.4 (-5.0, 5.7)   | 1.0 (-4.2, 6.3)   | 4.1 (-1.4, 9.7)  |
| Difference from TD                                                            | -0.1 (-7.6, 7.5)   | -3.8 (-11.5, 3.9) | -3.1 (-10.7, 4.5) |                  |
| Females                                                                       | 0.1 (-2.9, 3.1)    | -3.1 (-5.7, -0.5) | -3.5 (-9.6, 2.7)  | -3.3 (-8.3, 1.8) |
| Difference from TD                                                            | 3.3 (-2.6, 9.2)    | 0.2 (-5.5, 5.9)   | -0.2 (-8.2, 7.8)  |                  |
| <b>Externalizing behavior score difference: early puberty vs late puberty</b> |                    |                   |                   |                  |
|                                                                               | <b>ADHD</b>        | <b>ASD</b>        | <b>OCD</b>        | <b>TD</b>        |
| Males                                                                         | -3.7 (-10.5, 3.1)  | 0.6 (-3.6, 4.8)   | -3.4 (-9.1, 2.4)  | 0.0 (-5.4, 5.5)  |
| Difference from TD                                                            | -3.7 (-12.4, 5.0)  | 0.6 (-6.3, 7.5)   | -3.4 (-11.3, 4.5) |                  |
| Females                                                                       | -5.3 (-10.2, -0.3) | -1.0 (-3.7, 1.7)  | 1.1 (-4.0, 6.3)   | -0.9 (-5.3, 3.5) |
| Difference from TD                                                            | -4.4 (-11.0, 2.3)  | -0.1 (-5.3, 5.0)  | 2.0 (-4.8, 8.8)   |                  |

ADHD: attention-deficit hyperactivity disorder; ASD: autism spectrum disorder; CBCL: Child Behavior Checklist; OCD: obsessive compulsive disorder; TD: typically developing.
